# Supplementary material for: 8-TQEN (N,N,N′,N′-tetrakis(8-quinolylmethyl)ethylenediamine) analogs as fluorescent cadmium sensors: strategies to enhance Cd2+-induced fluorescence and Cd2+/Zn2+ selectivity
Source: Royal Society of Chemistry journal article supplement (doi:10.1039/c4ra00010b), 2014-01-01
Supplement: c4ra00010b1.pdf [file c4ra00010b1.pdf]

Supplementary Information for

**8-TQEN (*N,N,N',N'*-tetrakis(8-quinolylmethyl)ethylenediamine) Analogs as Fluorescent  
Cadmium Sensors: Strategies to Enhance Cd<sup>2+</sup>-Induced Fluorescence and Cd<sup>2+</sup>/Zn<sup>2+</sup>  
Selectivity**

Yuji Mikata,<sup>a,b,\*</sup> Ayaka Takekoshi,<sup>b</sup> Asako Kizu,<sup>b</sup> Yuki Nodomi,<sup>b</sup> Masato Aoyama,<sup>c</sup> Keiko  
Yasuda,<sup>c</sup> Satoshi Tamotsu,<sup>c</sup> Hideo Konno<sup>d</sup> and Shawn C. Burdette<sup>e,\*</sup>

<sup>a</sup>*KYOUSEI Science Center, <sup>b</sup>Department of Chemistry, and <sup>c</sup>Department of Biological  
Sciences, Faculty of Science, Nara Women's University, Nara 630-8506, Japan and*

<sup>d</sup>*Department of Chemistry and Biochemistry, Worcester Polytechnic Institute, Worcester, MA*

*01609-2280*

## Experimental

**6-Methoxy-8-methylquinoline.** To the refluxing mixture of 4-methoxy-2-methylaniline (2.00 g, 14.6 mmol), glycerol (13.4 g, 146 mmol) and dry nitrobenzene (3.0 mL, 29.2 mmol) was added sulfuric acid (3.0 mL, 56.3 mmol) and further refluxed for 5 h. The resultant solution was cooled to r.t., added 30 mL of water and treated with activated carbon. The filtrate was washed with ether and resultant aqueous layer was made to alkaline (pH > 12) and extracted with dichloromethane. The organic layer was dried and evaporated to give 6-methoxy-8-methylquinoline (941 mg, 5.43 mmol, 37%).

$^1\text{H}$  NMR ( $\text{CDCl}_3$ ):  $\delta$  (ppm) 8.79 (dd,  $J = 1.8, 4.3$  Hz, 1H), 8.03 (dd,  $J = 1.8, 8.2$  Hz, 1H), 7.35 (dd,  $J = 4.3, 8.2$  Hz, 1H), 7.23 (dd,  $J = 1.1, 2.7$  Hz, 1H), 6.92 (d,  $J = 2.7$  Hz, 1H), 3.92 (s, 3H), 2.78 (s, 3H).

$^{13}\text{C}$  NMR ( $\text{CDCl}_3$ ):  $\delta$  (ppm) 156.9, 146.5, 143.4, 138.5, 134.8, 129.2, 122.0, 121.0, 102.9, 55.4, 18.3.

**6-Methoxyquinoline-8-carbaldehyde.** The mixture of 6-methoxy-8-methylquinoline (975 mg, 5.60 mmol) and  $\text{SeO}_2$  (1.25 g, 11.2 mmol) in diglyme (30 mL) was refluxed for 42 h. The resultant solution was cooled to r.t., filtered with celite and evaporated to give 6-methoxyquinoline-8-carbaldehyde (844 mg, 4.51 mmol, 80%).

$^1\text{H}$  NMR ( $\text{CDCl}_3$ ):  $\delta$  (ppm) 11.40 (s, 1H), 8.90 (dd,  $J = 1.7, 4.3$  Hz, 1H), 8.14 (dd,  $J = 1.7, 8.2$  Hz, 1H), 7.98 (d,  $J = 3.1$  Hz, 1H), 7.46 (dd,  $J = 4.3, 8.2$  Hz, 1H), 7.38 (d,  $J = 3.1$  Hz, 1H).

$^{13}\text{C}$  NMR ( $\text{CDCl}_3$ ):  $\delta$  (ppm) 191.8, 156.8, 148.5, 143.2, 134.7, 132.4, 129.6, 121.8, 120.3, 112.3, 55.9.

Anal. Calcd for  $\text{C}_{11}\text{H}_9\text{NO}_2$ : C, 70.58; H, 4.85; N, 7.48. Found: C, 70.66; H, 4.82; N, 7.47.

**8-Hydroxymethyl-6-methylquinoline.** To the solution of 6-methoxyquinoline-8-carbaldehyde (844 mg, 4.51 mmol) in ethanol (70 mL) was added  $\text{NaBH}_4$  (204 mg, 5.41 mmol) and stirred for 5 h at room temperature. Water was added and the solution was

extracted with dichloromethane, dried and evaporated to give 8-hydroxymethyl-6-methoxyquinoline as white solid (725 mg, 3.83 mmol, 85%).

$^1\text{H}$  NMR ( $\text{CDCl}_3$ ):  $\delta$  (ppm) 8.70 (dd,  $J = 1.8, 4.3$  Hz, 1H), 8.07 (dd,  $J = 1.8, 8.2$  Hz, 1H), 7.39 (dd,  $J = 4.3, 8.5$  Hz, 1H), 7.24 (d,  $J = 2.7$  Hz, 1H), 6.99 (d,  $J = 2.7$  Hz, 1H), 5.15 (s, 3H), 3.92 (s, 3H).

$^{13}\text{C}$  NMR ( $\text{CDCl}_3$ ):  $\delta$  (ppm) 157.0, 146.1, 143.0, 139.4, 135.2, 129.5, 121.3, 120.2, 104.1, 64.5, 55.5.

Anal. Calcd for  $\text{C}_{11}\text{H}_{11}\text{NO}_2$ : C, 69.83; H, 5.86; N, 7.40. Found: C, 69.73; H, 5.83; N, 7.35.

**8-Chloromethyl-6-methoxyquinoline.** The solution of 8-hydroxymethyl-6-methoxyquinoline (1.20 g, 6.34 mmol) and thionyl chloride (0.45 mL, 6.39 mmol) in dichloromethane (70 mL) was stirred for overnight at room temperature. The resultant solution was washed with saturated sodium carbonate. The organic layer was dried, evaporated and purified by column chromatography (Silica gel; eluent: ethyl acetate/hexane = 1/2) to give 8-chloromethyl-6-methoxyquinoline as white solid (747 mg, 3.60 mmol, 57%).

$^1\text{H}$  NMR ( $\text{CDCl}_3$ ):  $\delta$  (ppm) 8.82 (dd,  $J = 1.5, 4.3$  Hz, 1H), 8.05 (dd,  $J = 1.5, 8.2$  Hz, 1H), 7.54 (d,  $J = 2.4$  Hz, 1H), 7.39 (dd,  $J = 4.3, 8.2$  Hz, 1H), 7.05 (d,  $J = 2.6$  Hz, 1H), 5.28 (s, 2H), 3.94 (s, 3H).

$^{13}\text{C}$  NMR ( $\text{CDCl}_3$ ):  $\delta$  (ppm) 156.8, 147.2, 141.7, 136.8, 134.7, 129.3, 124.4, 121.5, 105.5, 55.6, 42.3.

HRMS (ESI-MS)  $m/z$ :  $[\text{M} + \text{Na}]^+$  Calcd for  $\text{C}_{11}\text{H}_{10}\text{ClNONa}$  230.0349; Found 230.0312.

Anal. Calcd for  $\text{C}_{11}\text{H}_{10.2}\text{ClNO}_{1.1}$  (with 0.1 $\text{H}_2\text{O}$ ): C, 63.08; H, 4.91; N, 6.69. Found: C, 62.89; H, 4.80; N, 6.53.

***N,N,N',N'*-Tetrakis(8-quinolylmethyl)ethylenediamine (8-TQEN, 1a).** To a dry  $\text{CH}_3\text{CN}$  solution (30 mL) of 8-bromomethylquinoline (1.72 g, 7.75 mmol) and ethylenediamine (0.13 mL, 1.94 mmol) was added potassium carbonate (1.74 g, 12.6 mmol) and potassium iodide

(573 mg, 3.45 mmol). The resulting reaction mixture was refluxed for 2 days under N<sub>2</sub>. The resultant solution was cooled to room temperature and the solvent was evaporated. The residue was washed with CHCl<sub>3</sub> and water to give compound **1a** as a white solid (450 mg, 0.72 mmol, 37%). This material is insoluble to water, ethanol, chloroform, DMF, DMSO and other common organic solvents.

Anal. Calcd for C<sub>42</sub>H<sub>36</sub>N<sub>6</sub> (**1a**·0.2H<sub>2</sub>O): C, 80.29; H, 5.84; N, 13.37. Found: C, 80.07; H, 5.78; N, 13.28.

***N,N,N',N'*-Tetrakis(6-methoxy-8-quinolylmethyl)ethylenediamine (6-MeO-8-TQEN, 1b).** To a dry CH<sub>3</sub>CN solution (30 mL) of 6-methoxy-8-bromomethylquinoline (118 mg, 0.56 mmol) and ethylenediamine (9.5 μL, 0.14 mmol) was added potassium carbonate (196 mg, 1.40 mmol) and potassium iodide (236 mg, 1.40 mmol). The resulting reaction mixture was refluxed for 2 days under N<sub>2</sub>, cooled to room temperature and the solvent was evaporated. The residue was extracted with CHCl<sub>3</sub>/water and the organic layer was dried and evaporated to give compound **1b** as a white solid (109 mg, 0.14 mmol, quant.).

<sup>1</sup>H NMR (DMSO-*d*<sub>6</sub>): δ (ppm) 8.60 (dd, 4 H, *J* = 1.7, 4.1 Hz), 8.17 (dd, 4 H, *J* = 1.7, 8.1 Hz), 7.61 (d, 4 H, *J* = 2.4 Hz), 7.40 (dd, 4 H, *J* = 4.1, 8.1 Hz), 7.12 (d, 4 H, *J* = 2.4 Hz), 4.32 (s, 8 H), 3.74 (s, 12 H), 2.93 (s, 4 H).

<sup>13</sup>C NMR (DMSO-*d*<sub>6</sub>): δ (ppm) 156.7, 146.4, 142.0, 139.1, 134.8, 129.0, 121.3, 119.9, 103.8, 87.7, 55.2, 54.1.

HRMS (ESI-MS) *m/z*: [M + Na]<sup>+</sup> Calcd for C<sub>46</sub>H<sub>44</sub>N<sub>6</sub>O<sub>4</sub>Na 745.3502; Found 745.3567.

Anal. Calcd for C<sub>46</sub>H<sub>45</sub>N<sub>6</sub>O<sub>4.5</sub> (**1b**·0.5H<sub>2</sub>O): C, 73.28; H, 6.01; N, 11.14. Found: C, 73.23; H, 6.04; N, 11.17.

***N,N,N',N'*-Tetrakis(3-hydroxypropyl)propanediamine hydrobromide (3d·2HBr).** The agitated mixture of 1,3-diaminopropane (2.08 mL, 25.0 mmol), 3-bromo-1-propanol (9.0 mL, 0.10 mol) and powdered sodium carbonate (9.24 g, 0.11 mol) in dry ethanol (50 mL) was

refluxed for three days under N<sub>2</sub>. The resultant solution was cooled to r.t. and the solvent was evaporated. The residue was extracted with CHCl<sub>3</sub>, dried and evaporated to give compound **3d**·2HBr as orange oil (9.58 g, 20.5 mmol, 82%).

<sup>1</sup>H NMR (D<sub>2</sub>O): δ (ppm) 3.48 (t, *J* = 6.3 Hz, 8H), 2.38-2.51 (m, 12H), 1.54-1.62 (m, 10H).

<sup>13</sup>C NMR (D<sub>2</sub>O): δ (ppm) 60.3, 51.5, 51.0, 27.9.

HRMS (ESI-MS) *m/z*: [M + Na]<sup>+</sup> Calcd for C<sub>15</sub>H<sub>34</sub>N<sub>2</sub>O<sub>4</sub>Na 329.2416; Found 329.2416.

***N,N,N',N'*-Tetrakis(3-chloropropyl)ethylenediamine (4b).** The solution of *N,N,N',N'*-tetrakis(3-hydroxypropyl)ethylenediamine hydrobromide (**3b**·2HBr) (691 mg, 1.52 mmol) and thionyl chloride (2.0 mL, 28 mmol) in dichloromethane (30 mL) was refluxed for overnight under N<sub>2</sub>. The resultant solution was cooled to r.t. and washed with 6*N* NaOH<sub>aq</sub>. The organic layer was dried and evaporated to give compound **4b** as colorless oil (397 mg, 1.08 mmol, 71%).

<sup>1</sup>H NMR (CDCl<sub>3</sub>): δ (ppm) 3.61 (t, *J* = 6.3 Hz, 8H), 2.56 (t, *J* = 6.6 Hz, 8H), 2.49 (s, 4H), 1.88 (quint, *J* = 6.4 Hz, 8H).

<sup>13</sup>C NMR (CDCl<sub>3</sub>): δ (ppm) 52.7, 51.2, 43.2, 30.4.

Anal. Calcd for C<sub>14</sub>H<sub>28</sub>Cl<sub>4</sub>N<sub>2</sub> (**4b**): C, 45.92; H, 7.71; N, 7.65. Found: C, 46.52; H, 7.73; N, 7.86.

***N,N,N',N'*-Tetrakis(3-chloropropyl)propanediamine (4d).** The solution of *N,N,N',N'*-tetrakis(3-hydroxypropyl)propanediamine hydrobromide (**3d**·2HBr) (943 mg, 2.01 mmol) and thionyl chloride (1.15 mL, 16 mmol) in dichloromethane (30 mL) was refluxed for overnight under N<sub>2</sub>. The resultant solution was cooled to r.t. and washed with 6*N* NaOH<sub>aq</sub>. The organic layer was dried and evaporated to give compound **4d** as orange oil (751 mg, 1.97 mmol, 98%).

<sup>1</sup>H NMR (CDCl<sub>3</sub>): δ (ppm) 3.60 (t, *J* = 6.3 Hz, 8H), 2.54 (t, *J* = 6.6 Hz, 8H), 2.39 (t, *J* = 7.2 Hz, 4H), 1.88 (quint, *J* = 6.4 Hz, 8H), 1.60 (m, 2H).

$^{13}\text{C}$  NMR ( $\text{CDCl}_3$ ):  $\delta$  (ppm) 48.5, 46.9, 43.2, 32.9, 30.3.

Anal. Calcd for  $\text{C}_{15}\text{H}_{30.5}\text{Cl}_4\text{N}_2\text{O}_{0.25}$  (**4d**·0.25 $\text{H}_2\text{O}$ ): C, 46.83; H, 7.99; N, 7.28. Found: C, 46.96; H, 7.94; N, 7.11.

***N,N,N',N'*-Tetrakis(2-(8-quinolyloxy)ethyl)ethylenediamine (8-TQOEEN, 2a).** To an agitated mixture of 8-quinolinol (2.18 g, 14.8 mmol) and powdered potassium hydroxide (830 mg, 14.8 mmol) in dry ethanol (30 mL) was added *N,N,N',N'*-tetrakis(2-chloroethyl)ethylenediamine (**4a**) (460 mg, 1.48 mmol) in 3 mL of ethanol. The resulting reaction mixture was refluxed overnight under  $\text{N}_2$ , cooled to room temperature and the solvent was evaporated. The residue was extracted with  $\text{CHCl}_3$ /water and the organic layer was washed with 3N NaOH, dried and evaporated. The residue was purified by column chromatography (alumina,  $\text{CHCl}_3/\text{CH}_3\text{OH}$  99.5/0.5,  $R_f$  = 0.35) to give compound **2a** as a yellow oil (226 mg, 0.30 mmol, 20%).

$^1\text{H}$  NMR ( $\text{CDCl}_3$ ):  $\delta$  (ppm) 8.91 (dd,  $J$  = 4.3, 1.8 Hz, 4 H), 8.14 (dd,  $J$  = 8.2, 1.5 Hz, 4 H), 7.40-7.45 (m, 12 H), 7.06 (dd,  $J$  = 7.3, 1.5 Hz, 4 H), 4.34 (t,  $J$  = 5.8 Hz, 8 H), 3.05 (t,  $J$  = 6.0 Hz, 8 H), 2.76 (s, 4 H).

$^{13}\text{C}$  NMR ( $\text{CDCl}_3$ ):  $\delta$  (ppm) 154.0, 148.6, 139.5, 136.0, 129.3, 126.5, 121.6, 119.5, 64.2, 56.8, 52.5.

HRMS (ESI-MS)  $m/z$ :  $[\text{M} + \text{Na}]^+$  Calcd for  $\text{C}_{46}\text{H}_{44}\text{N}_6\text{O}_4\text{Na}$  767.3322; Found 767.3434.

***N,N,N',N'*-Tetrakis(3-(8-quinolyloxy)propyl)ethylenediamine (8-TQOPEN, 2b).** To an agitated mixture of 8-quinolinol (1.88 g, 13.0 mmol) and powdered potassium hydroxide (788 mg, 14.0 mmol) in dry ethanol (30 mL) was added *N,N,N',N'*-tetrakis(3-chloropropyl)ethylenediamine (**4b**) (397 mg, 1.08 mmol) in 3 mL of ethanol. The resulting reaction mixture was refluxed overnight under  $\text{N}_2$ , cooled to room temperature and the solvent was evaporated. The residue was extracted with  $\text{CHCl}_3$ /water and the organic layer was washed with 3N NaOH, dried and evaporated. The residue was purified by column

chromatography (alumina, CHCl<sub>3</sub>/CH<sub>3</sub>OH 99.5/0.5,  $R_f$  = 0.28) to give a yellow oil. This material was dissolved in small portions of acetonitrile and conc. hydrochloric acid was added to induce precipitation. After filtration, the obtained hydrochloride salt was dissolved in water and 6N NaOH was added to adjust the pH >12. The product was extracted into chloroform, dried and evaporated to give compound **2b** as a yellow oil (130 mg, 0.162 mmol, 15%).

<sup>1</sup>H NMR (CDCl<sub>3</sub>):  $\delta$  (ppm) 8.89 (dd,  $J$  = 4.3, 1.5 Hz, 4 H), 8.05 (dd,  $J$  = 8.5, 1.5 Hz, 4 H), 7.27-7.38 (m, 12 H), 6.87 (dd,  $J$  = 7.3, 1.5 Hz, 4 H), 4.06 (t,  $J$  = 6.6 Hz, 8 H), 2.55 (t,  $J$  = 6.6 Hz, 8 H), 2.43 (s, 4 H), 1.88 (quint,  $J$  = 6.5 Hz, 8 H).

<sup>13</sup>C NMR (CDCl<sub>3</sub>):  $\delta$  (ppm) 154.5, 148.9, 140.1, 135.5, 129.2, 126.5, 121.3, 119.1, 108.5, 66.7, 52.6, 50.7, 26.9.

HRMS (ESI-MS)  $m/z$ : [M + Na]<sup>+</sup> Calcd for C<sub>50</sub>H<sub>52</sub>N<sub>6</sub>O<sub>4</sub>Na 823.3948; Found 823.3985.

Anal. Calcd for C<sub>50</sub>H<sub>57</sub>Cl<sub>2</sub>N<sub>6</sub>O<sub>5.5</sub> (**2b**·2HCl·1.5H<sub>2</sub>O): C, 66.66; H, 6.38; N, 9.33. Found: C, 66.77; H, 5.99; N, 9.23.

***N,N,N',N'*-Tetrakis(2-(8-quinolyloxy)ethyl)propanediamine (8-TQOEPN, 2c).** To an agitated mixture of 8-quinolinol (1.53 g, 10.6 mmol) and powdered potassium hydroxide (592 mg, 10.6 mmol) in dry ethanol (30 mL) was added *N,N,N',N'*-tetrakis(2-chloroethyl)propanediamine (**4c**) (285 mg, 1.06 mmol) in 3 mL of ethanol. The resulting reaction mixture was refluxed overnight under N<sub>2</sub>, cooled to room temperature and the solvent was evaporated. The residue was extracted with CHCl<sub>3</sub>/water and the organic layer was washed with 3N NaOH, dried and evaporated. The residue was purified by column chromatography (alumina, CHCl<sub>3</sub>/CH<sub>3</sub>OH 99.5/0.5,  $R_f$  = 0.3) to give compound **2c** as a yellow oil (88 mg, 0.12 mmol, 9%).

$^1\text{H}$  NMR ( $\text{CDCl}_3$ ):  $\delta$  (ppm) 8.88 (dd,  $J = 4.3, 1.8$  Hz, 4 H), 8.06 (dd,  $J = 8.2, 1.5$  Hz, 4 H), 7.29-7.40 (m, 12 H), 7.02 (dd,  $J = 6.4, 2.7$  Hz, 4 H), 4.34 (t,  $J = 6.6$  Hz, 8 H), 4.34 (t,  $J = 6.7$  Hz, 8 H), 3.24 (t,  $J = 6.6$  Hz, 8 H), 2.82 (t,  $J = 7.2$  Hz, 8 H), 2.61 (s, 4 H), 1.85 (br., 2 H).

$^{13}\text{C}$  NMR ( $\text{CDCl}_3$ ):  $\delta$  (ppm) 154.2, 148.9, 140.0, 135.5, 129.2, 126.5, 121.3, 119.3, 108.7, 77.2, 67.2, 53.6, 25.4.

HRMS (ESI-MS)  $m/z$ :  $[\text{M} + \text{Na}]^+$  Calcd for  $\text{C}_{47}\text{H}_{46}\text{N}_6\text{O}_4\text{Na}$  781.3398; Found 781.3478.

Anal. Calcd for  $\text{C}_{47}\text{H}_{50}\text{N}_6\text{O}_6$  (**2c**·2 $\text{H}_2\text{O}$ ): C, 71.01; H, 6.34; N, 10.57. Found: C, 70.77; H, 6.35; N, 10.88.

***N,N,N',N'*-Tetrakis(3-(8-quinolyloxy)propyl)propanediamine (8-TQOPPN, 2d)**. To an agitated mixture of 8-quinolinol (2.67 g, 18.4 mmol) and powdered potassium hydroxide (1.03 g, 18.4 mmol) in dry ethanol (30 mL) was added *N,N,N',N'*-tetrakis(3-chloropropyl)propanediamine (**4d**) (700 mg, 1.84 mmol) in 3 mL of ethanol. The resulting reaction mixture was refluxed overnight under  $\text{N}_2$ . The resultant solution was cooled to room temperature and the solvent was evaporated. The residue was extracted with  $\text{CHCl}_3$ /water and the organic layer was washed with 3N NaOH, dried and evaporated. The residue was purified by column chromatography (alumina, AcOEt/MeOH 98/2,  $R_f = 0.6$ ) to give yellow oil. This material was dissolved in a small portion of ethanol and conc. hydrochloric acid was added to induce precipitation. After filtration, the hydrochloride salt was dissolved in water and 6N NaOH was added to adjust the pH >12. The product was extracted into chloroform, dried and evaporated to give compound **2d** as a yellow oil (195 mg, 0.239 mmol, 13%).

$^1\text{H}$  NMR ( $\text{CDCl}_3$ ):  $\delta$  (ppm) 8.90 (dd,  $J = 4.3, 1.8$  Hz, 4 H), 8.04 (dd,  $J = 8.2, 1.8$  Hz, 4 H), 7.26-7.38 (m, 12 H), 6.89 (dd,  $J = 7.3, 1.5$  Hz, 4 H), 4.10 (t,  $J = 6.7$  Hz, 8 H), 2.57 (br., 8 H), 2.40 (br., 4 H), 2.06 (quint,  $J = 6.6$  Hz, 8 H), 1.54 (br., 2 H).

$^{13}\text{C}$  NMR ( $\text{CDCl}_3$ ):  $\delta$  (ppm) 154.5, 148.8, 140.0, 135.5, 129.1, 126.4, 121.2, 119.0, 108.4, 66.9, 52.3, 50.1, 26.8, 24.5.



HRMS (ESI-MS)  $m/z$ :  $[M + H]^+$  Calcd for  $C_{51}H_{55}N_6O_4$  815.4286; Found 815.4285.

Anal. Calcd for  $C_{51}H_{60}ClN_2O_{6.5}$  (**2d**·HCl·2.5H<sub>2</sub>O): C, 68.32; H, 6.75; N, 9.37. Found: C, 68.51; H, 6.35; N, 9.26.

**Measurements.** Measurements for **1b** and **2c** were performed in DMF/HEPES buffer (1:1 (v/v), 50 mM HEPES, 100 mM KCl, pH = 8.0). Measurements for **2a**, **2b** and **2c** were performed in DMF/water (1:1). The reproducibility of all measurements has been confirmed. The values of the quantum yield are from single measurement. The  $K_d$ 's are mean values of three independent measurements.

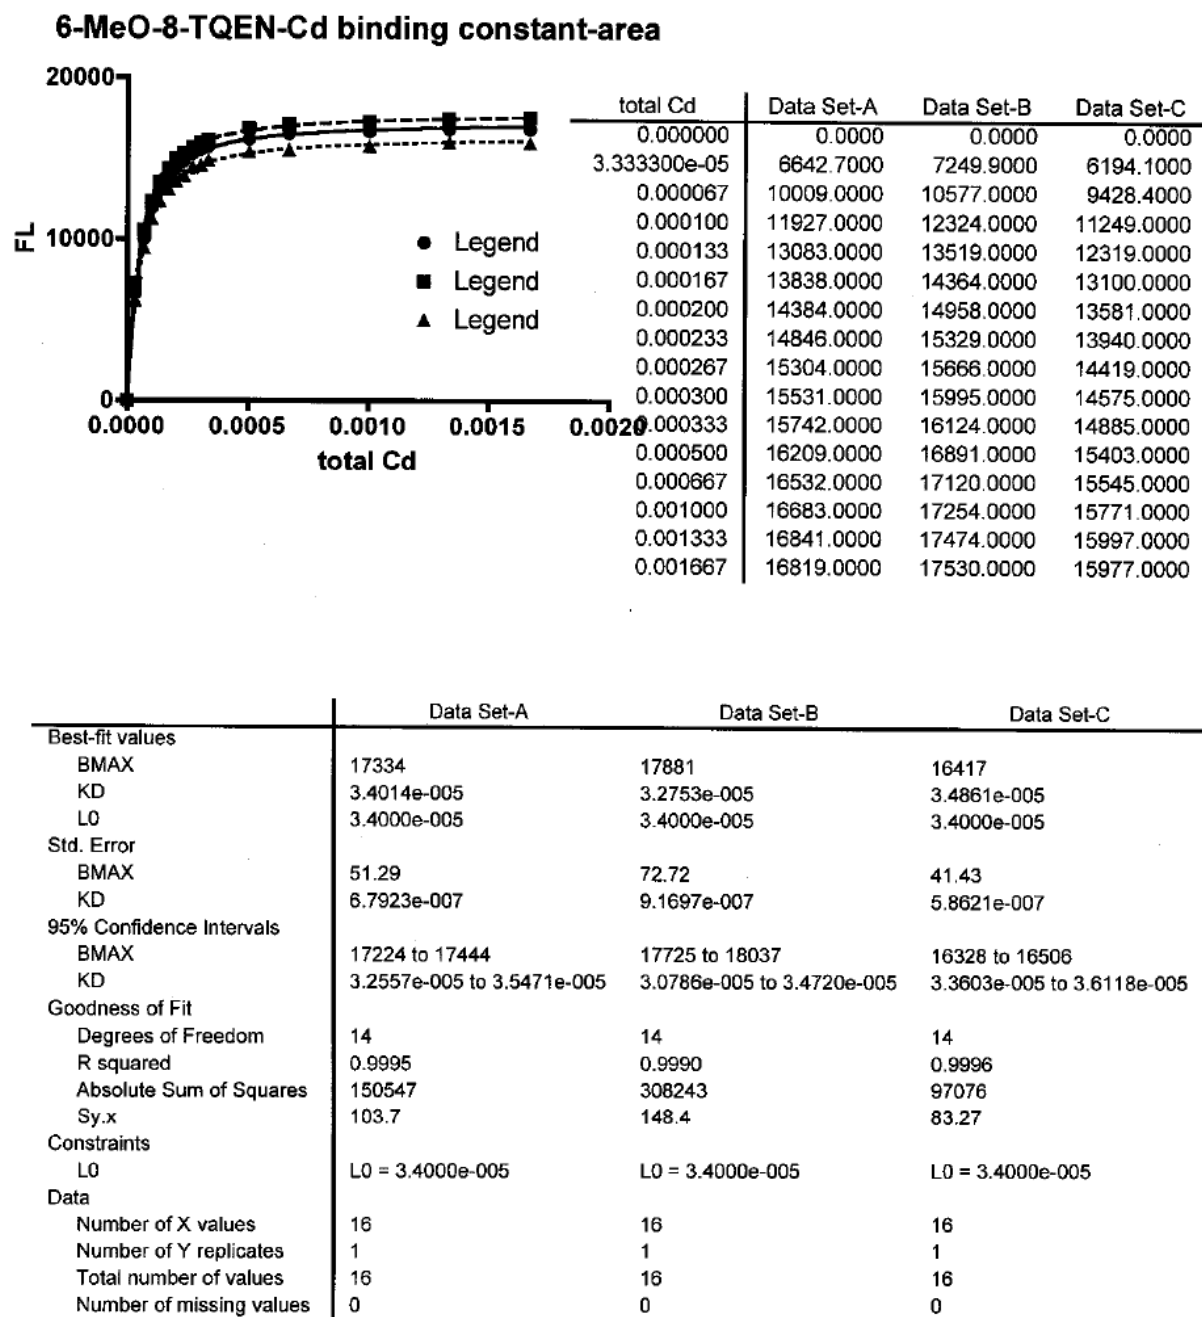

**Figure S1.** Estimation of dissociation constant of **1b** with Cd<sup>2+</sup> ion.

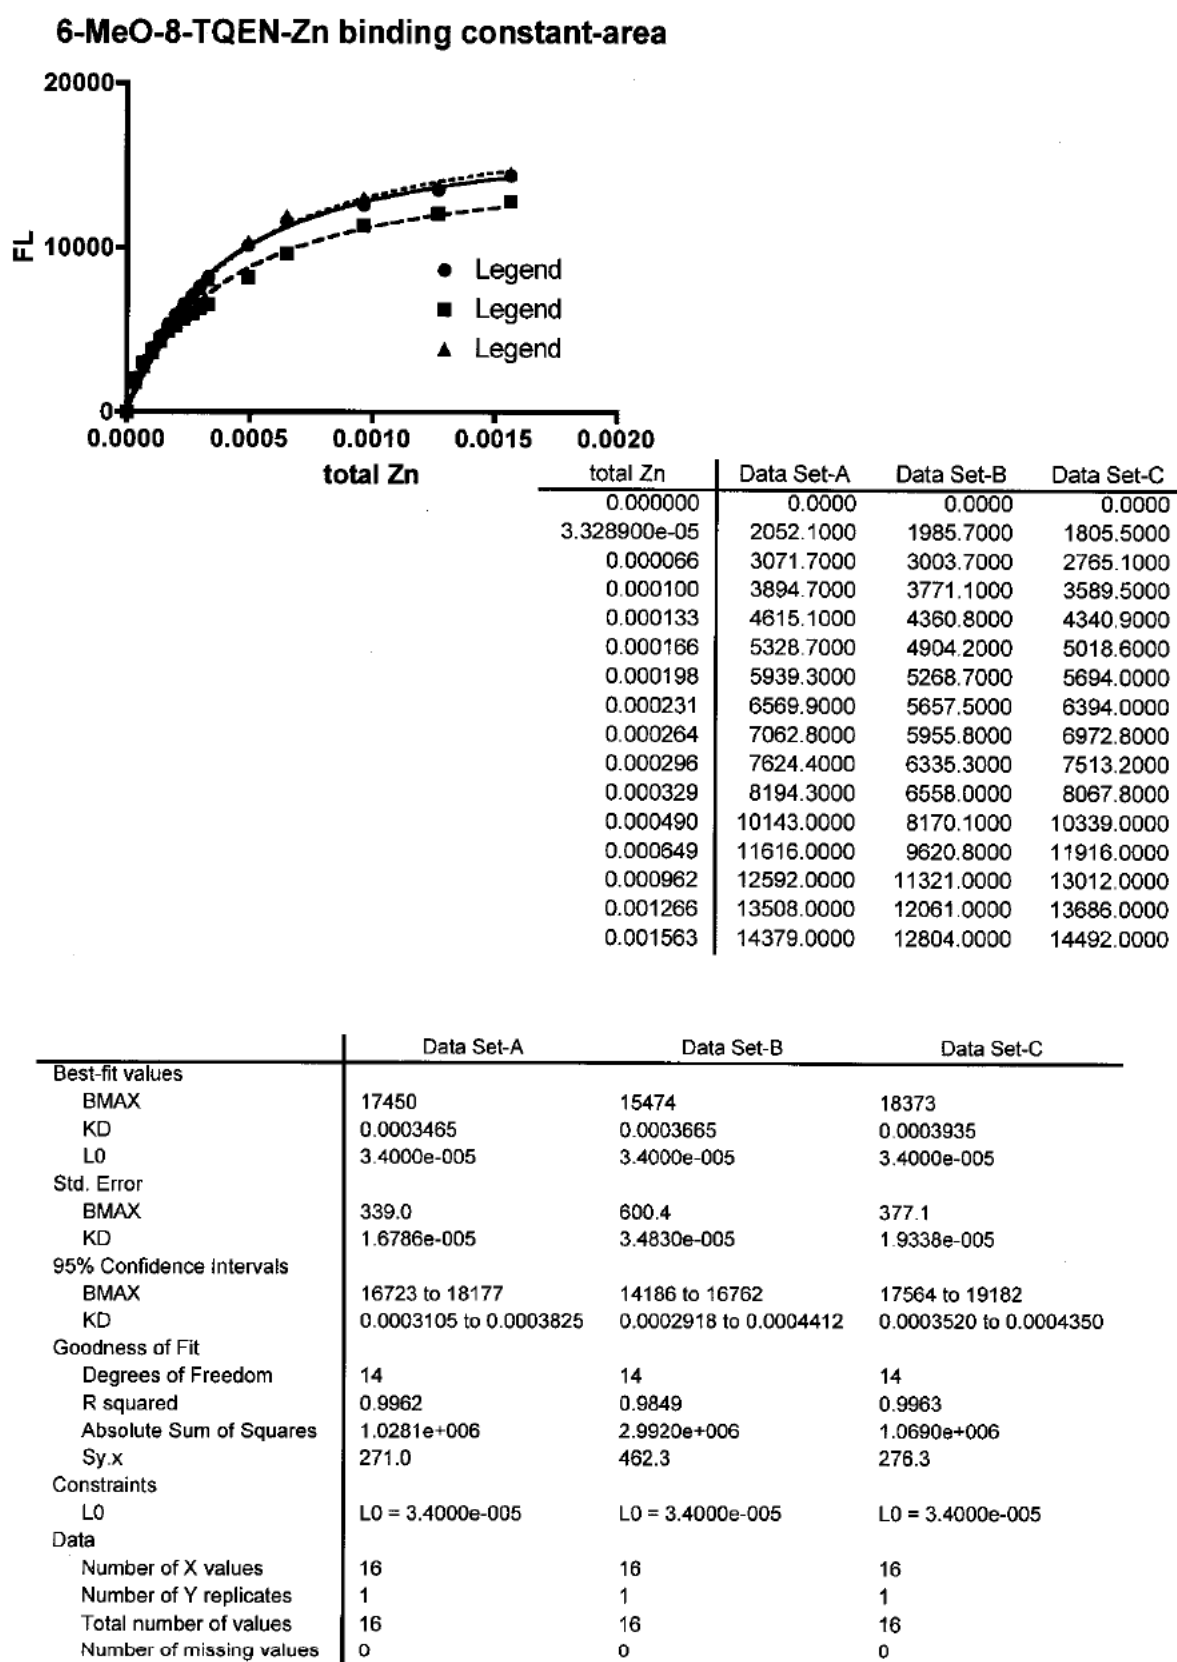

**Figure S2.** Estimation of dissociation constant of **1b** with  $\text{Zn}^{2+}$  ion.

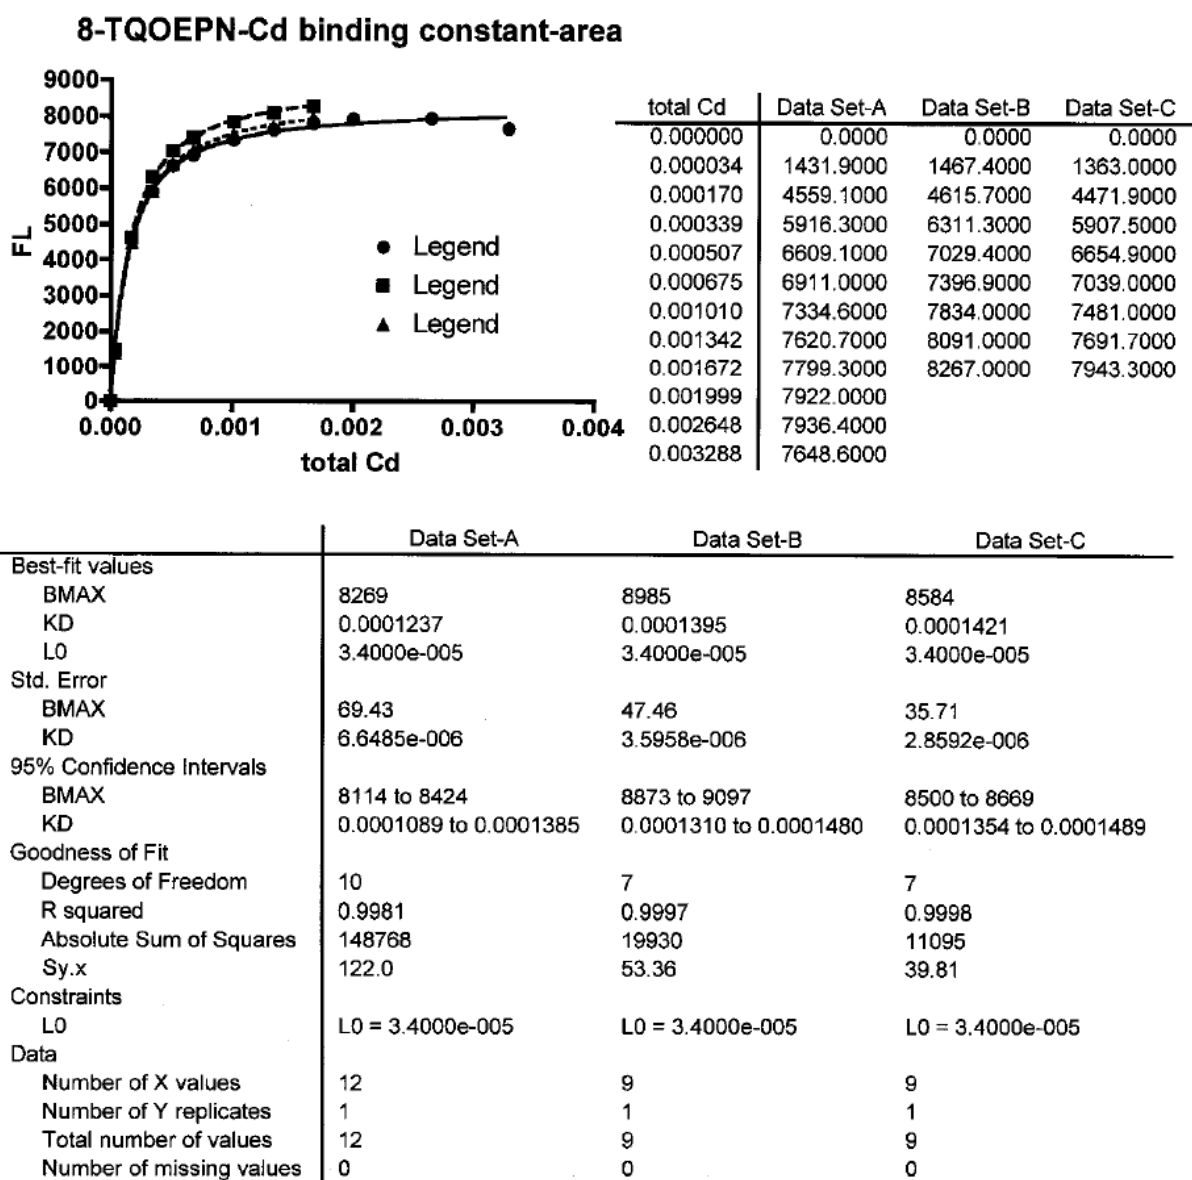

**Figure S3.** Estimation of dissociation constant of **2c** with  $\text{Cd}^{2+}$  ion.

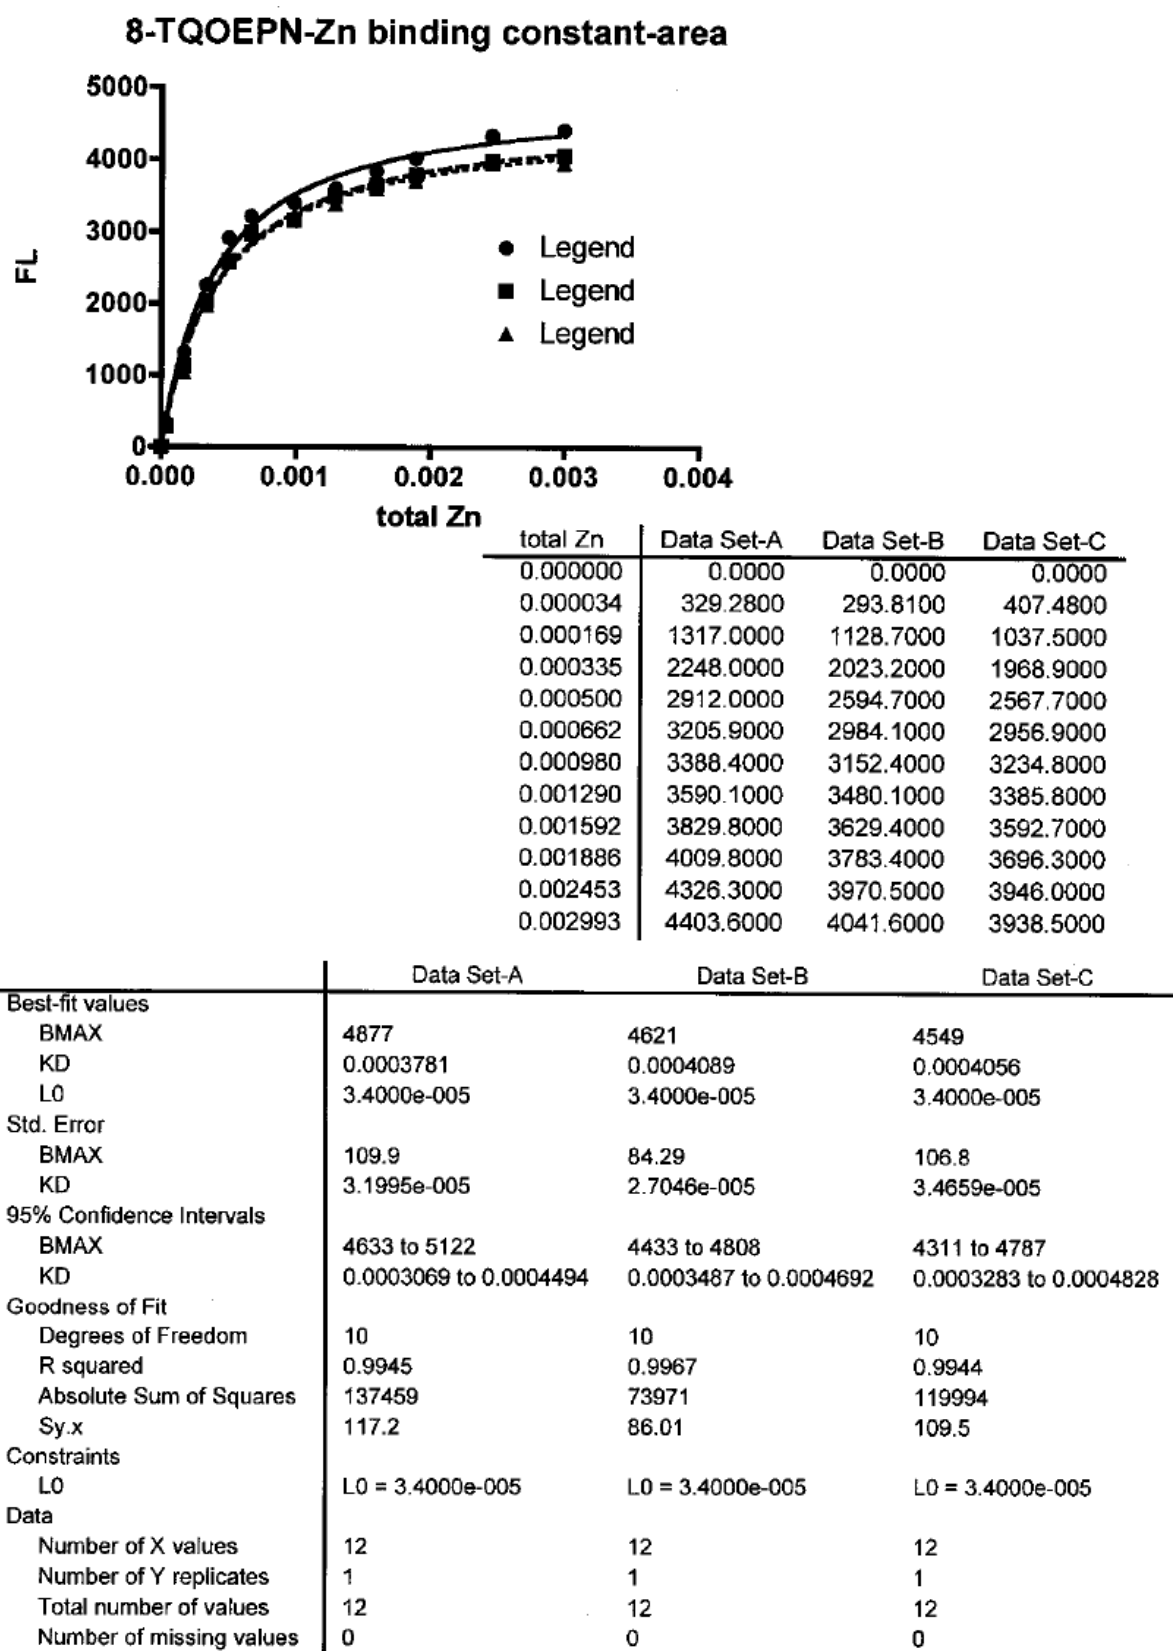

**Figure S4.** Estimation of dissociation constant of **2c** with  $\text{Zn}^{2+}$  ion.

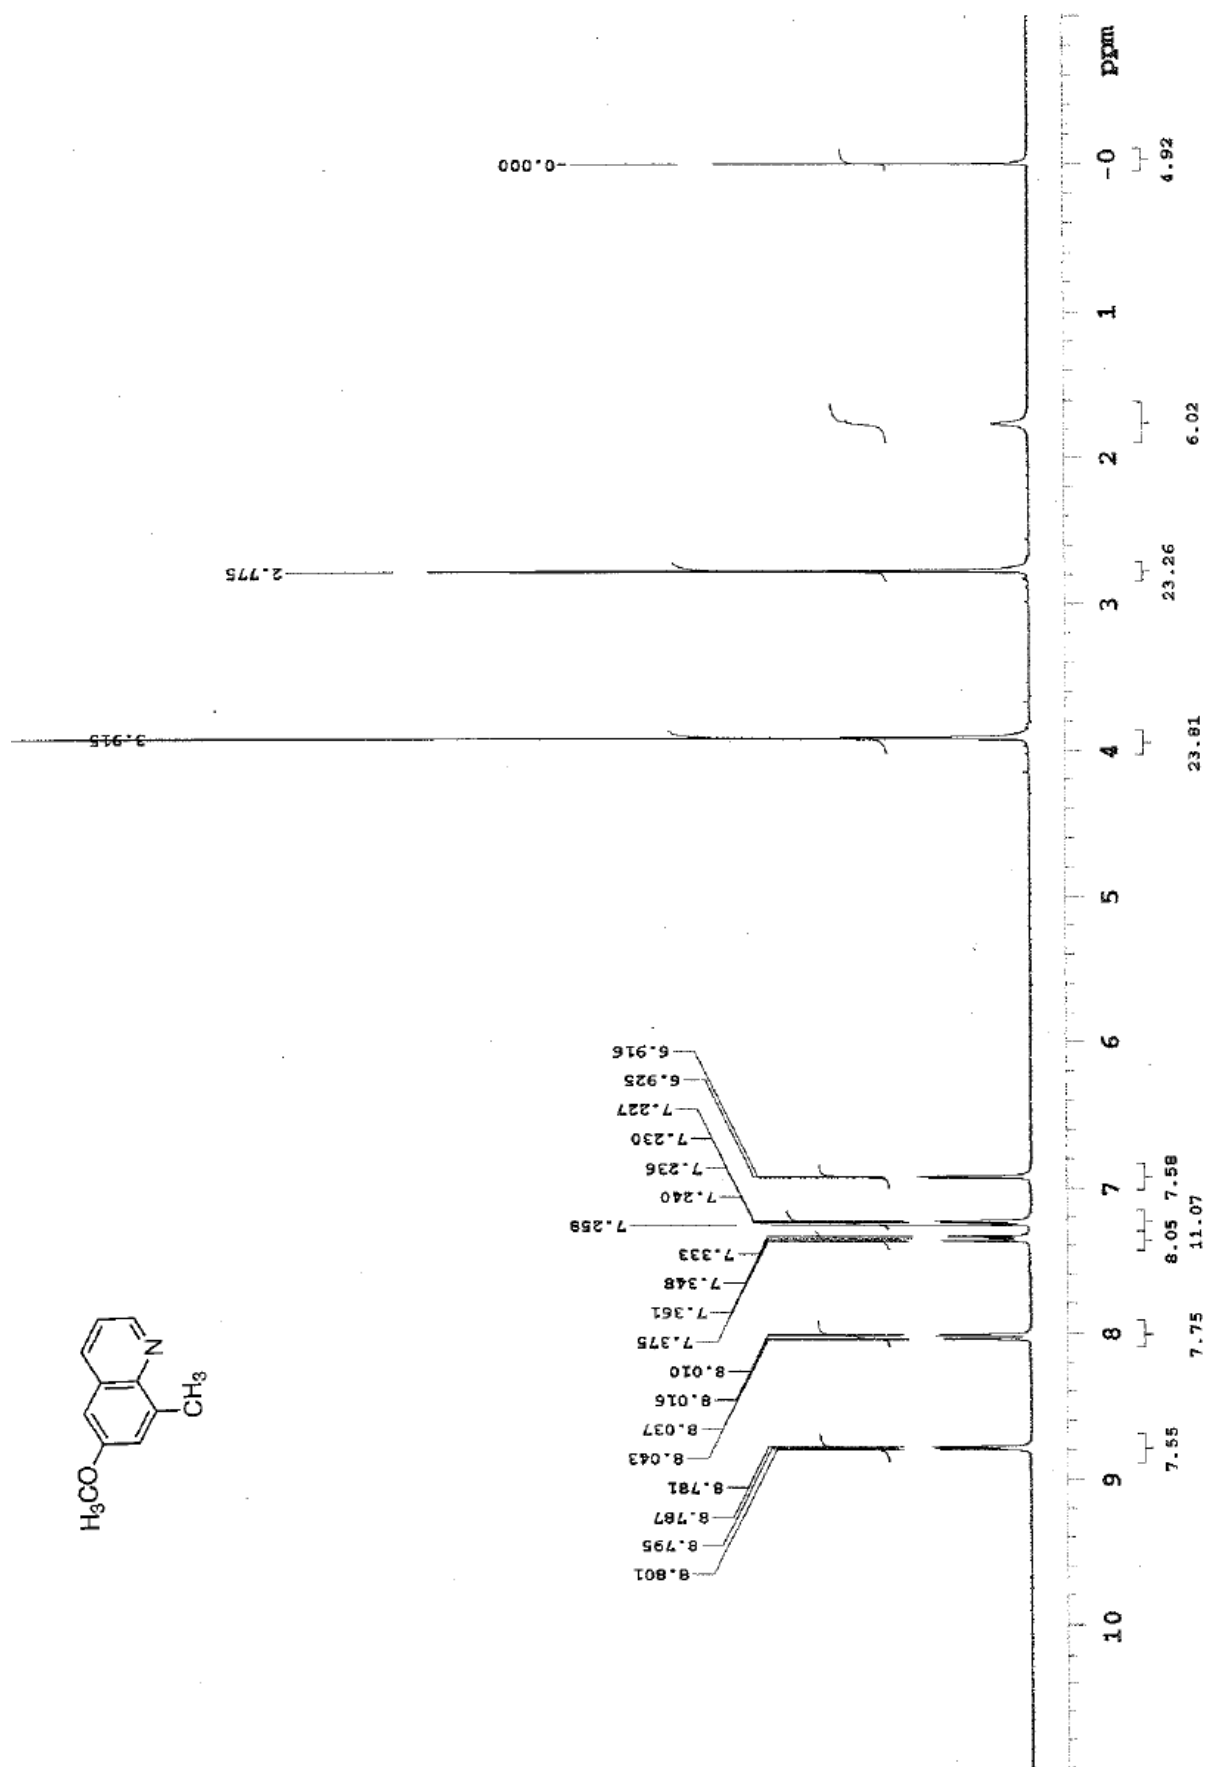

Figure S5. <sup>1</sup>H NMR spectrum of 6-methoxy-8-methylquinoline in CDCl<sub>3</sub>.

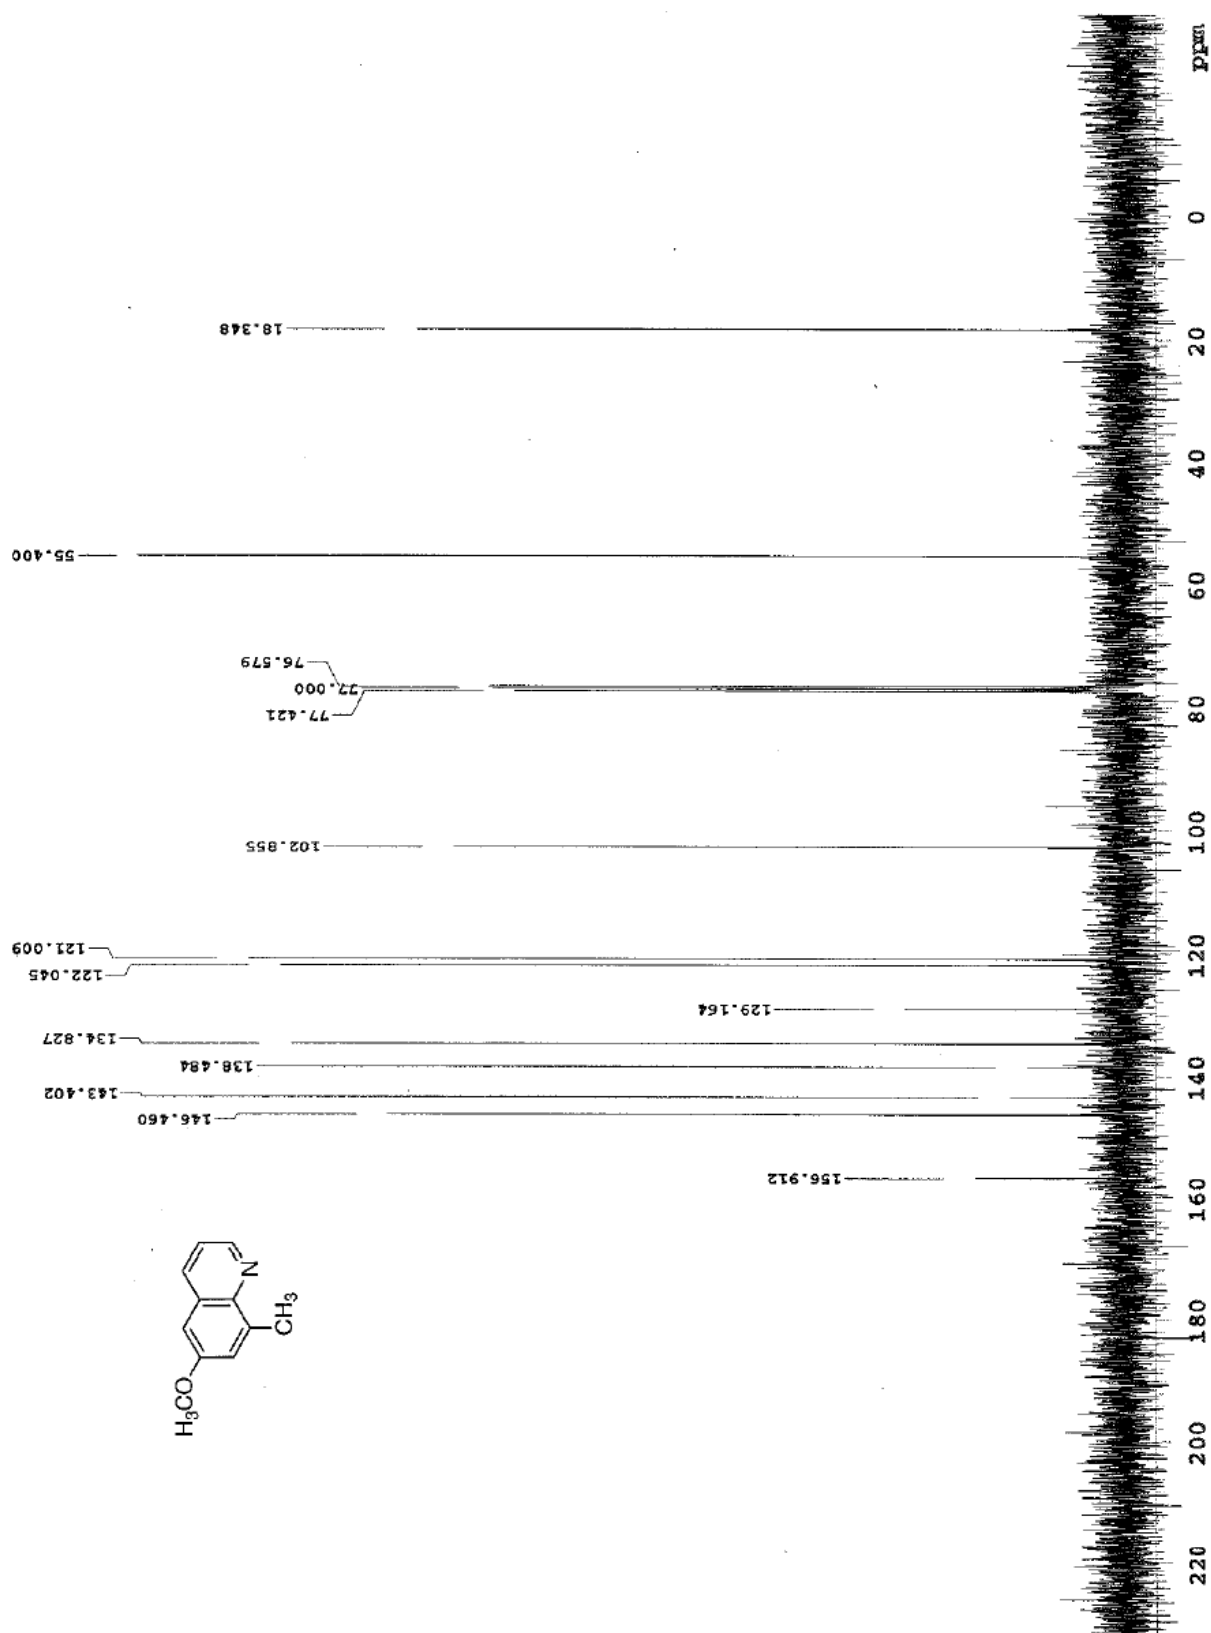

**Figure S6.**  $^{13}\text{C}$  NMR spectrum of 6-methoxy-8-methylquinoline in  $\text{CDCl}_3$ .

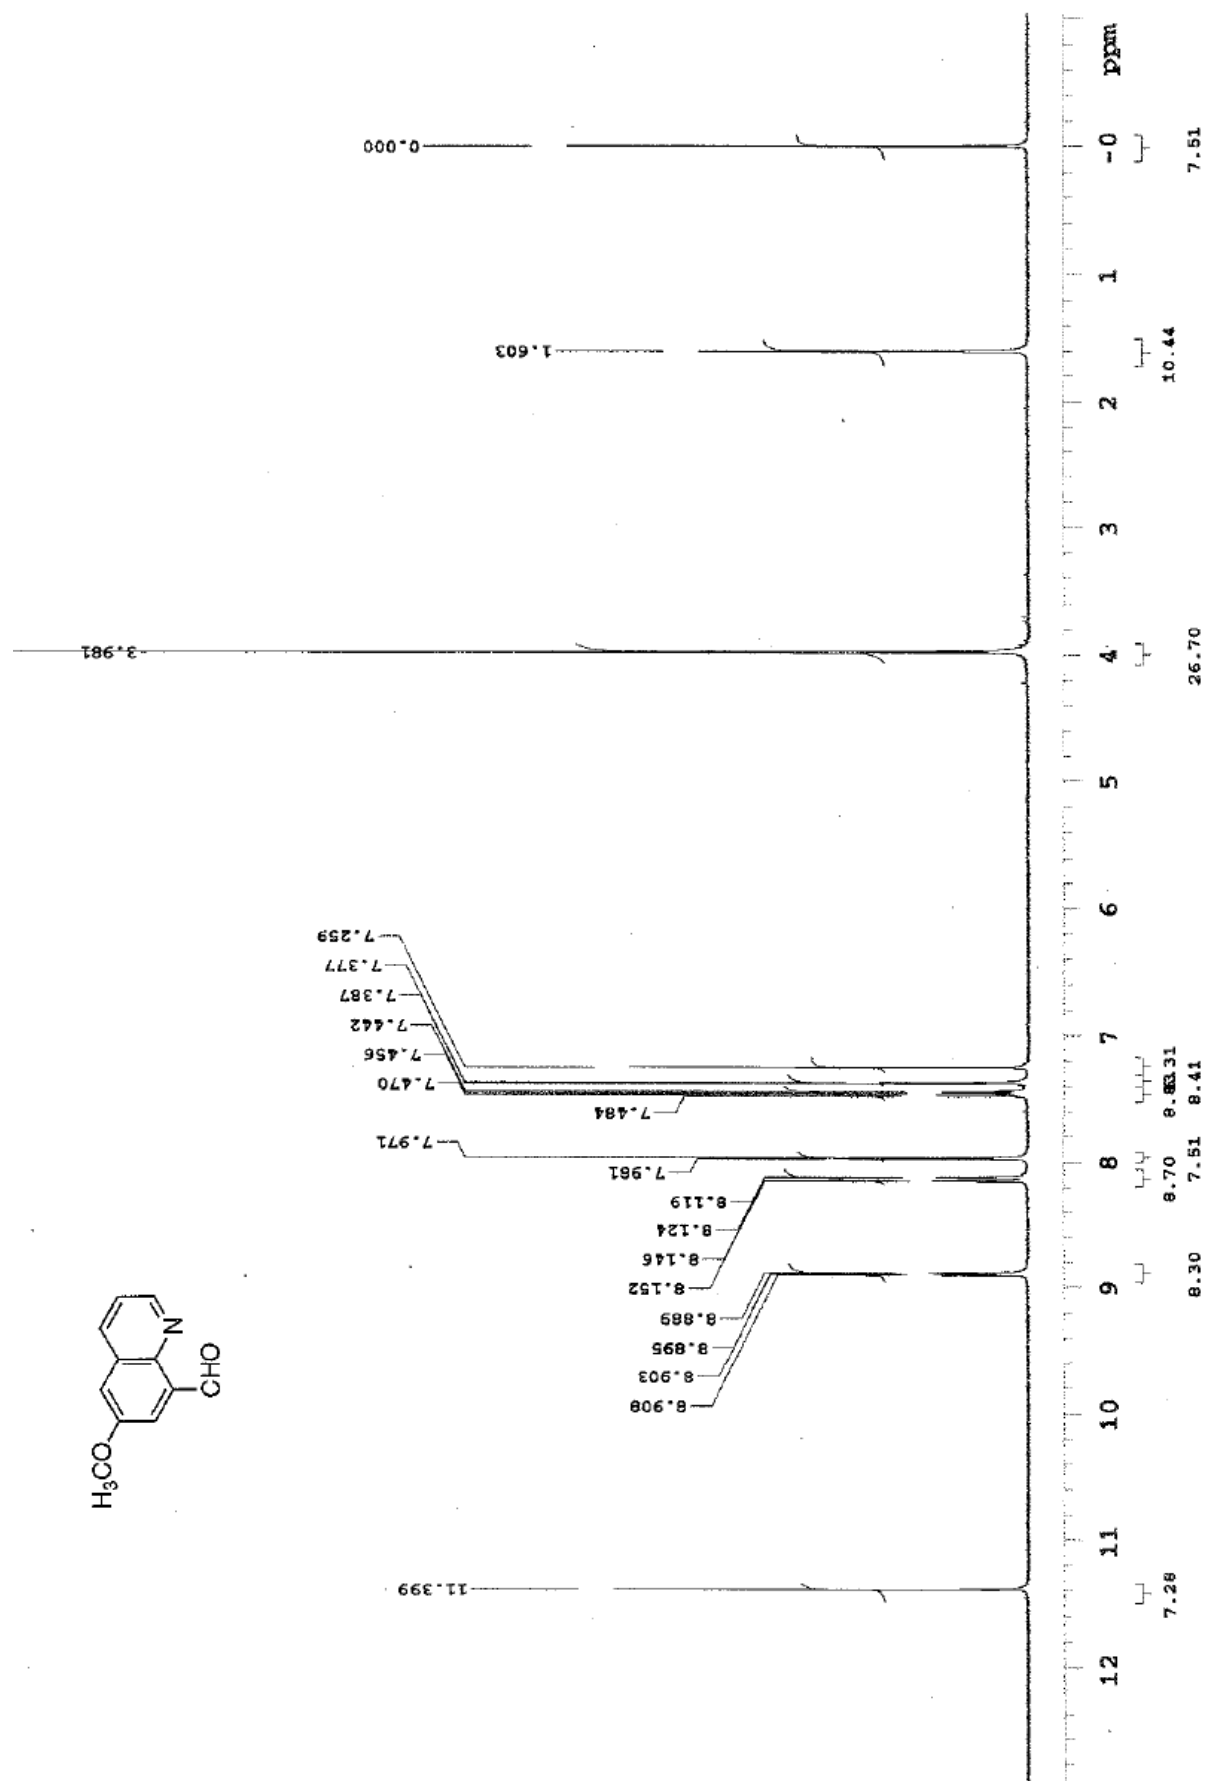

Figure S7. <sup>1</sup>H NMR spectrum of 6-methoxyquinoline-8-carbaldehyde in CDCl<sub>3</sub>.



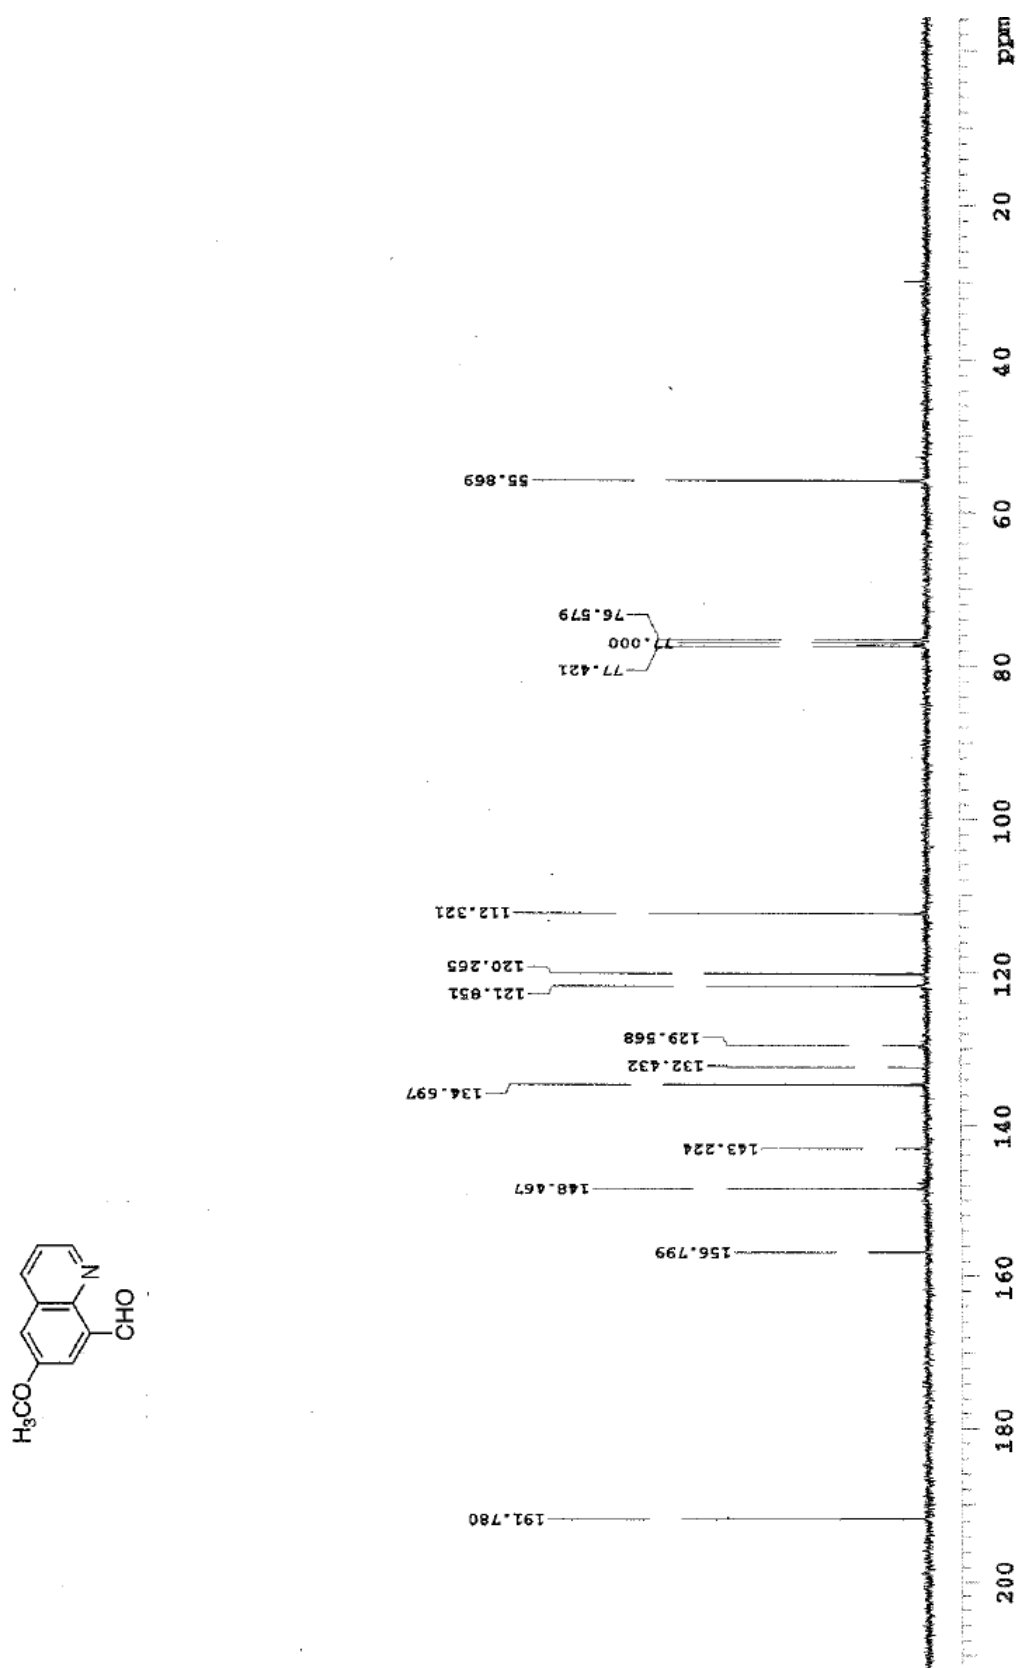

**Figure S8.**  $^{13}\text{C}$  NMR spectrum of 6-methoxyquinoline-8-carbaldehyde in  $\text{CDCl}_3$ .

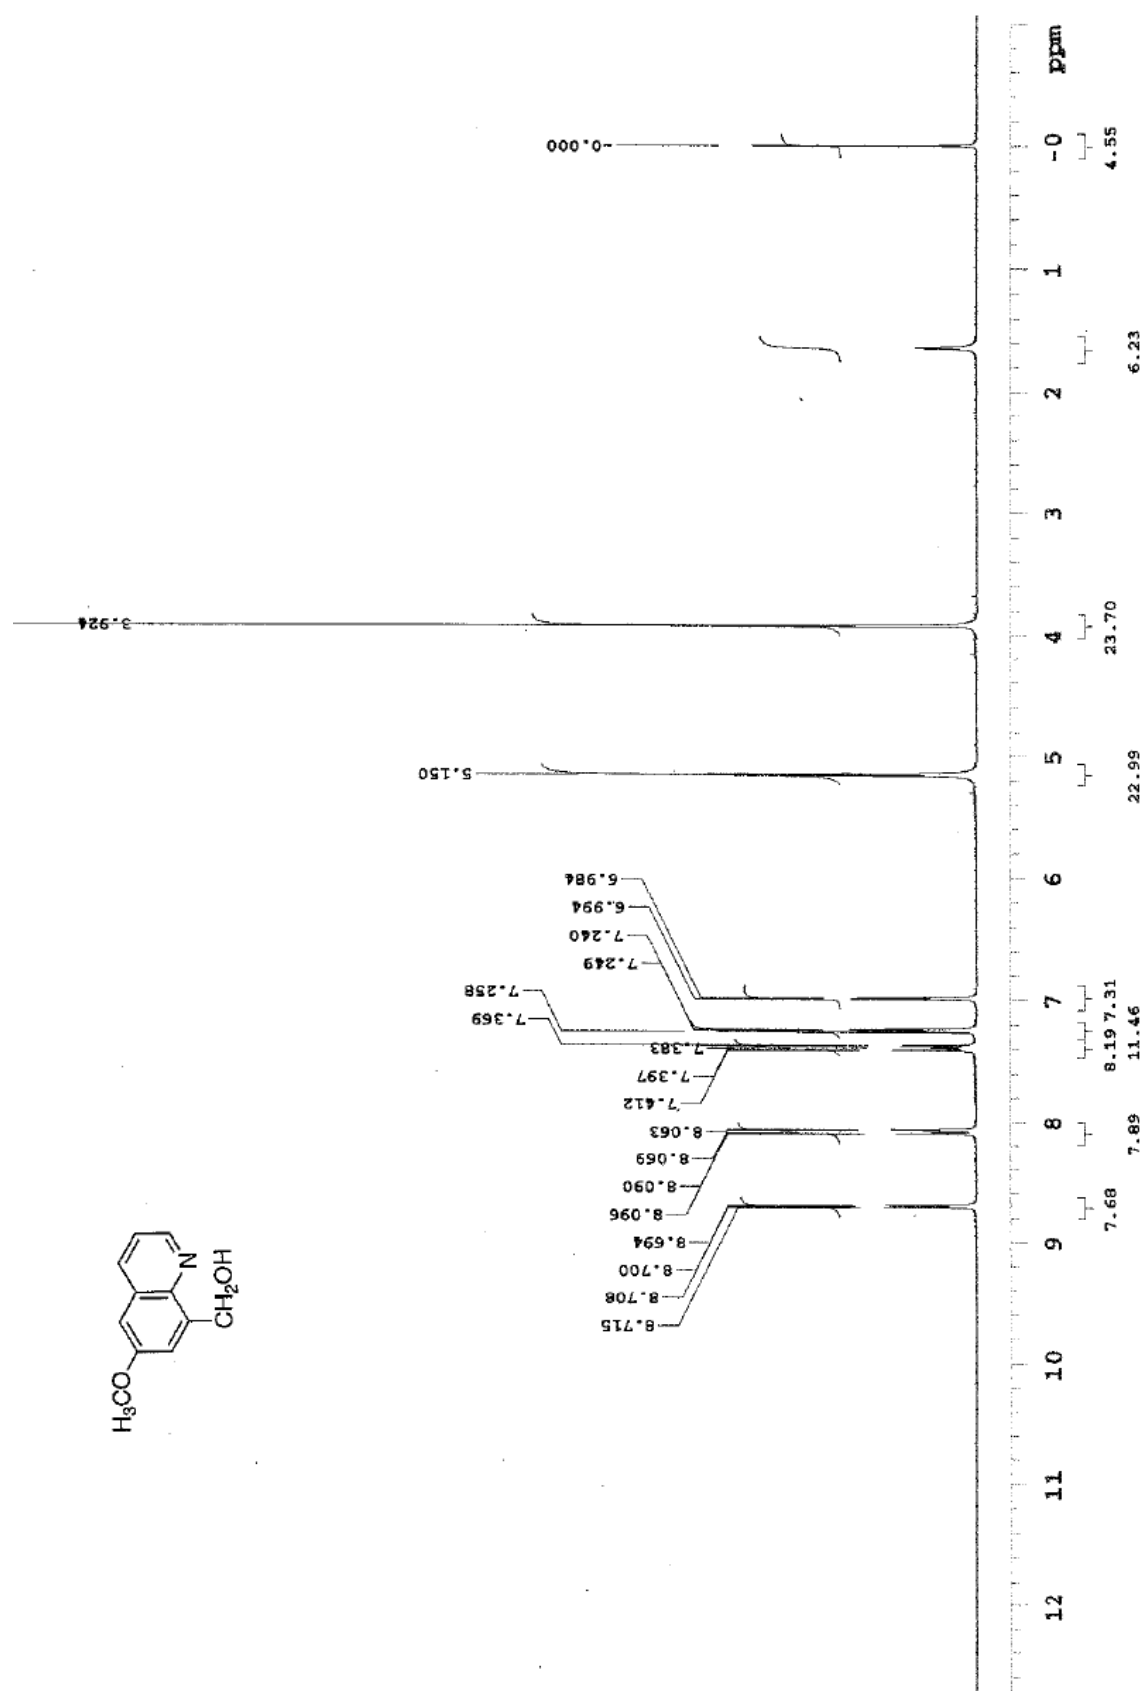

**Figure S9.** <sup>1</sup>H NMR spectrum of 8-hydroxymethyl-6-methoxyquinoline in CDCl<sub>3</sub>.

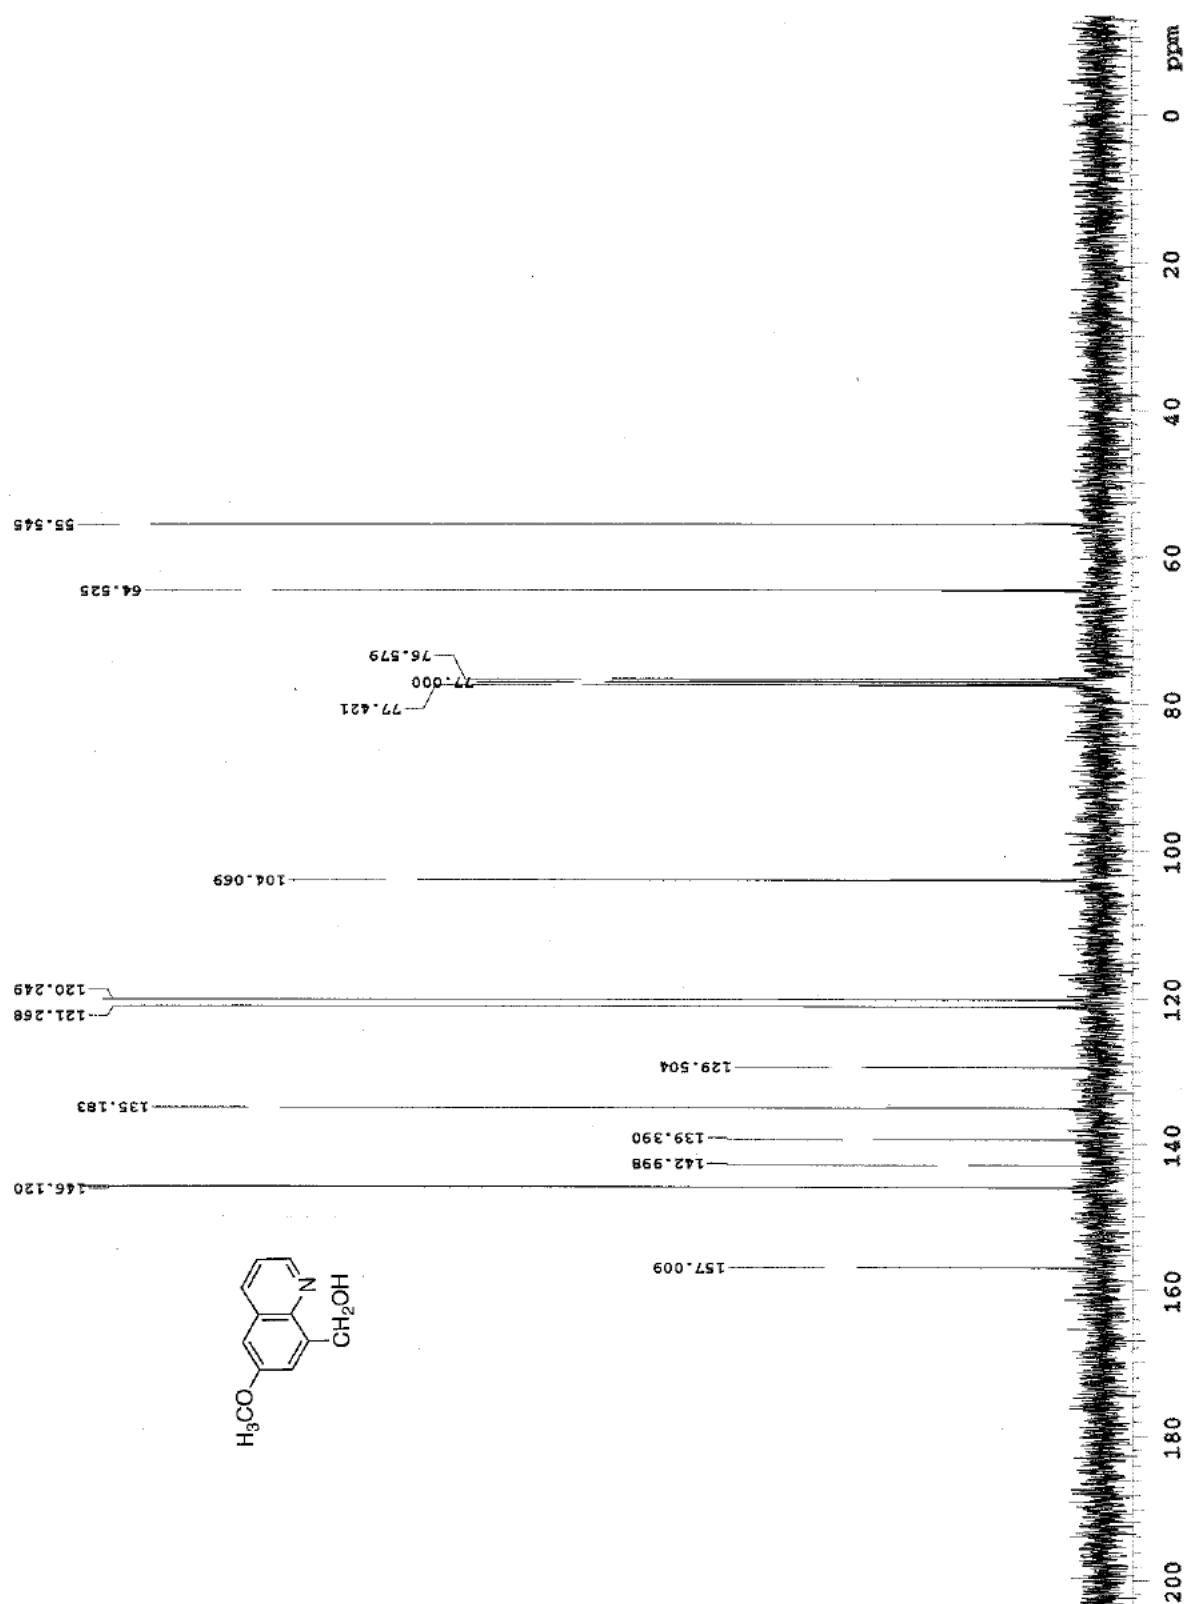

**Figure S10.**  $^{13}\text{C}$  NMR spectrum of 8-hydroxymethyl-6-methoxyquinoline in  $\text{CDCl}_3$ .

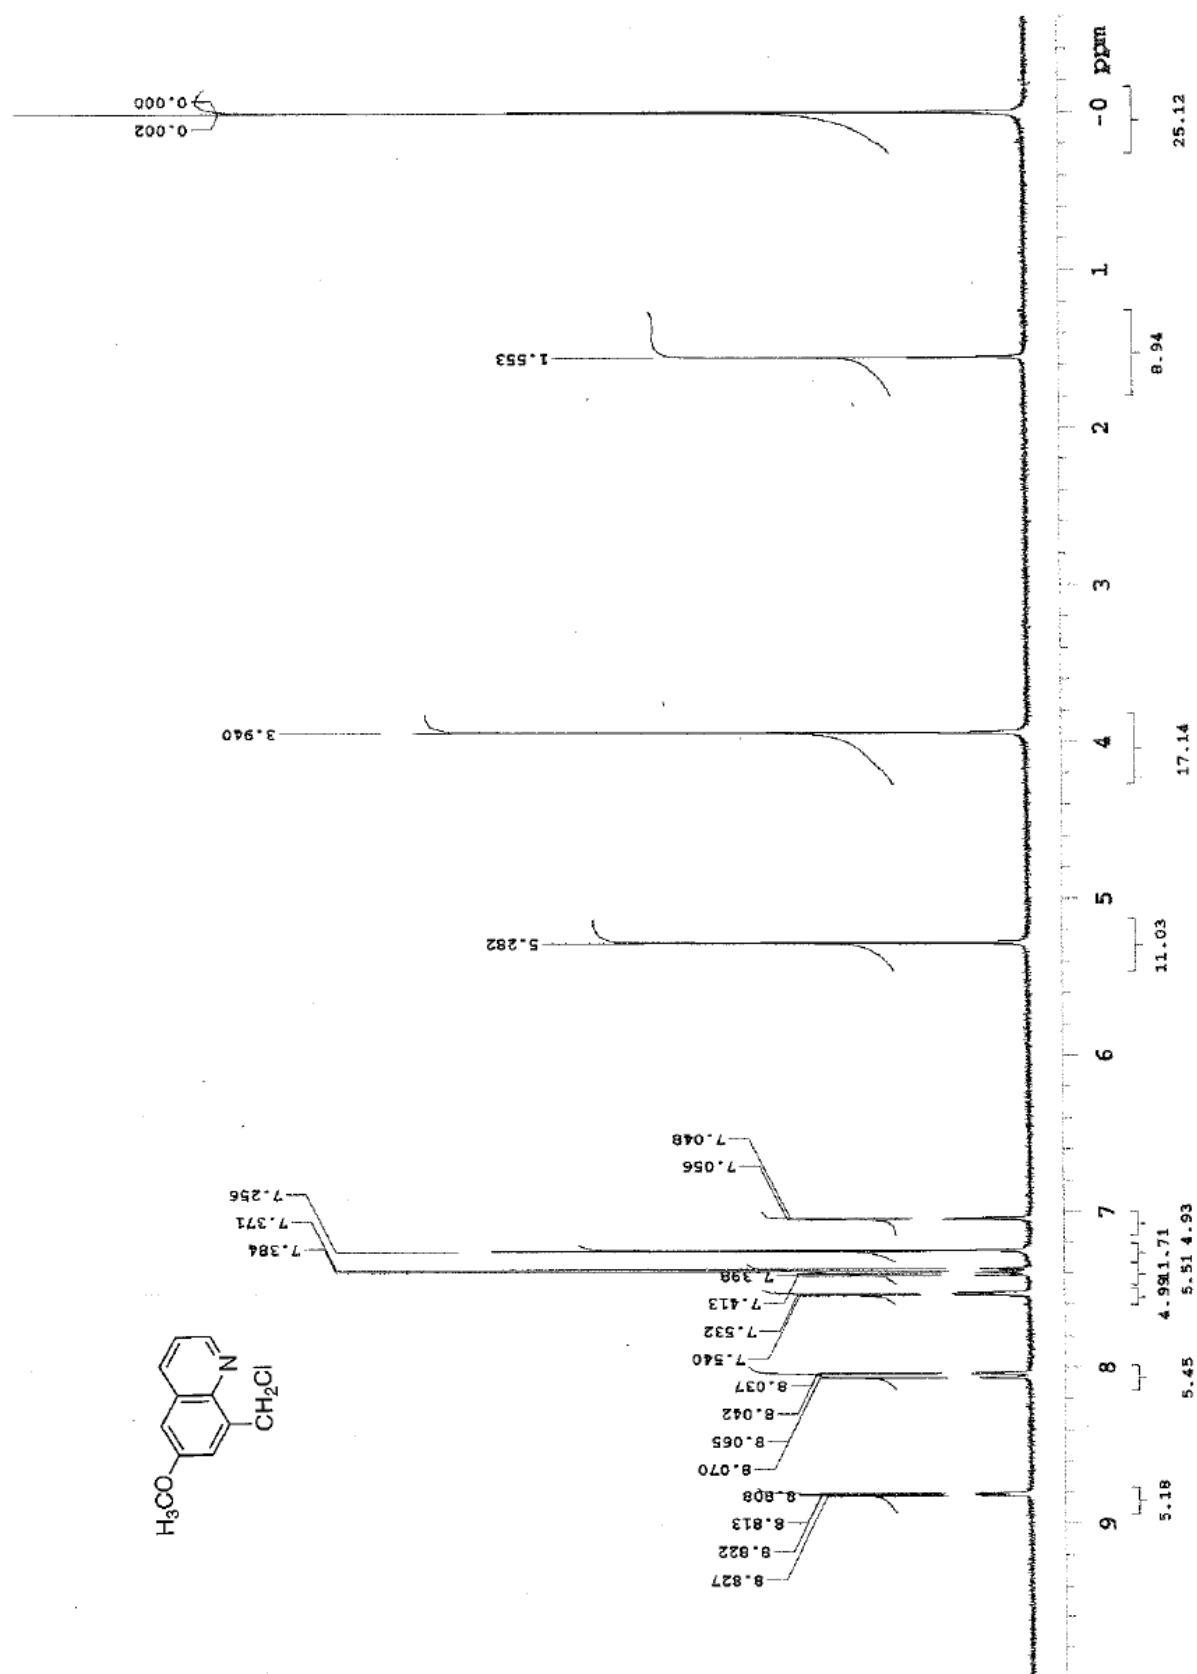

**Figure S11.**  $^1\text{H}$  NMR spectrum of 8-chloromethyl-6-methoxyquinoline in  $\text{CDCl}_3$ .

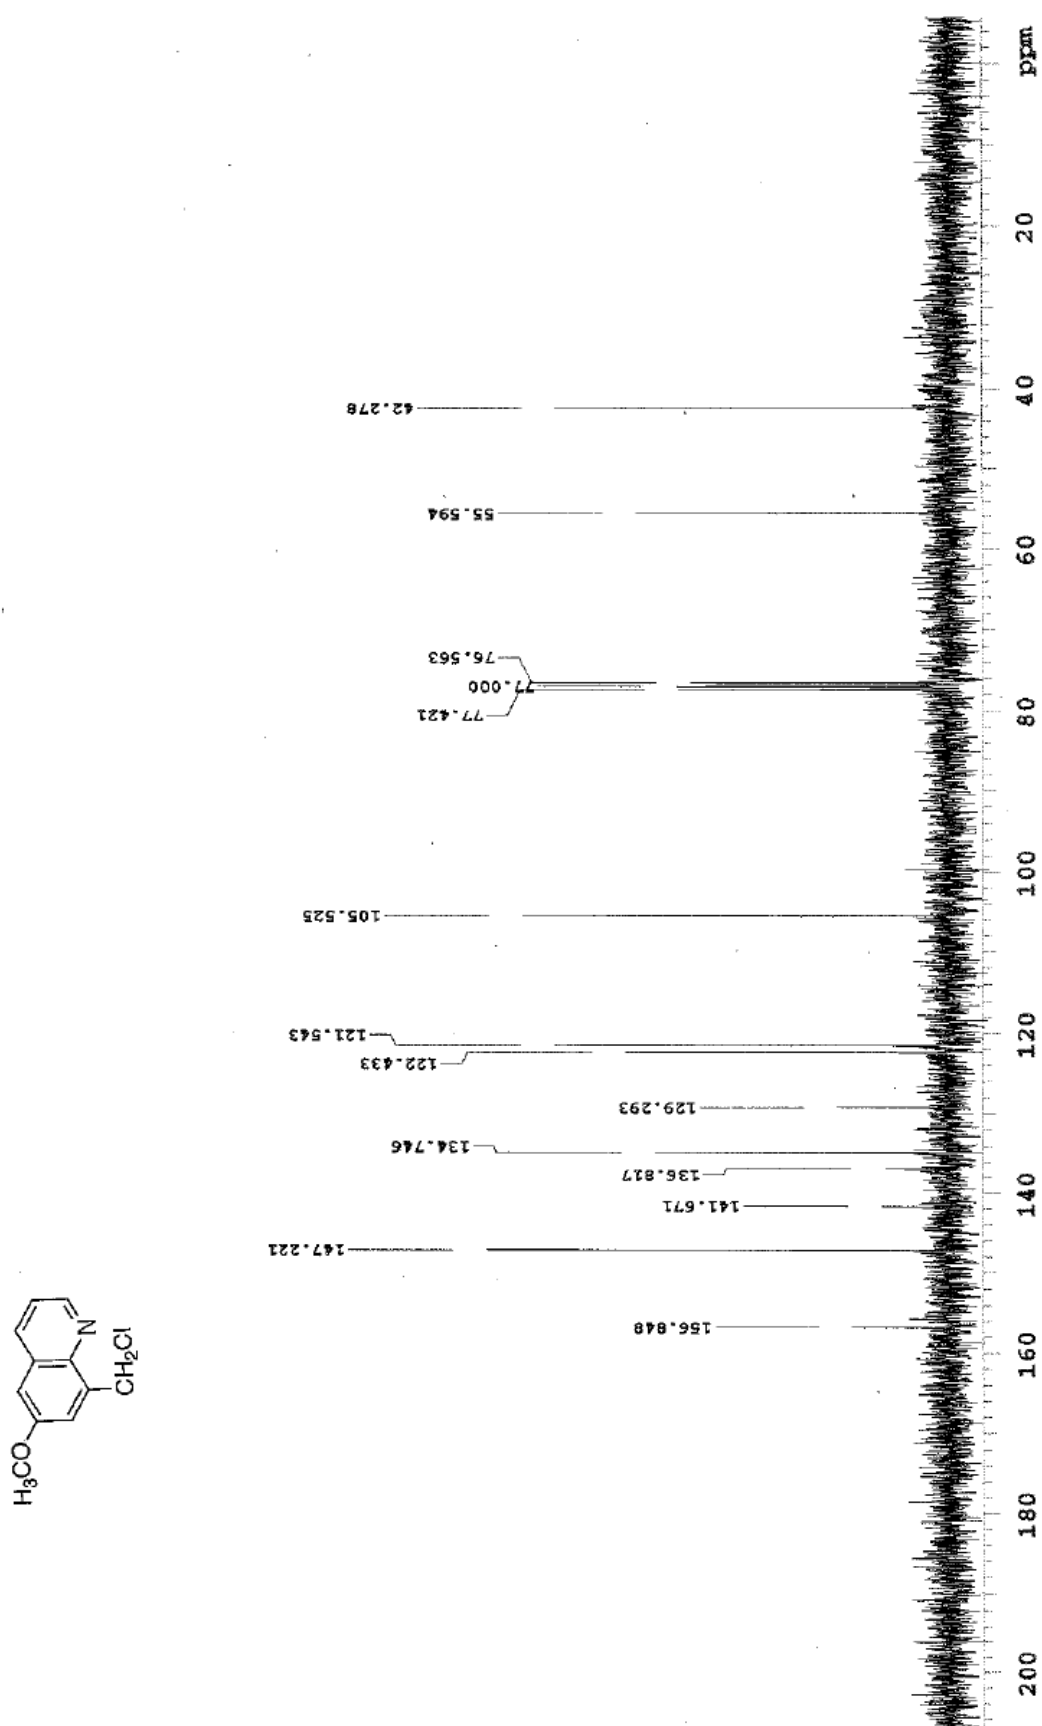

**Figure S12.**  $^{13}\text{C}$  NMR spectrum of 8-chloromethyl-6-methoxyquinoline in  $\text{CDCl}_3$ .

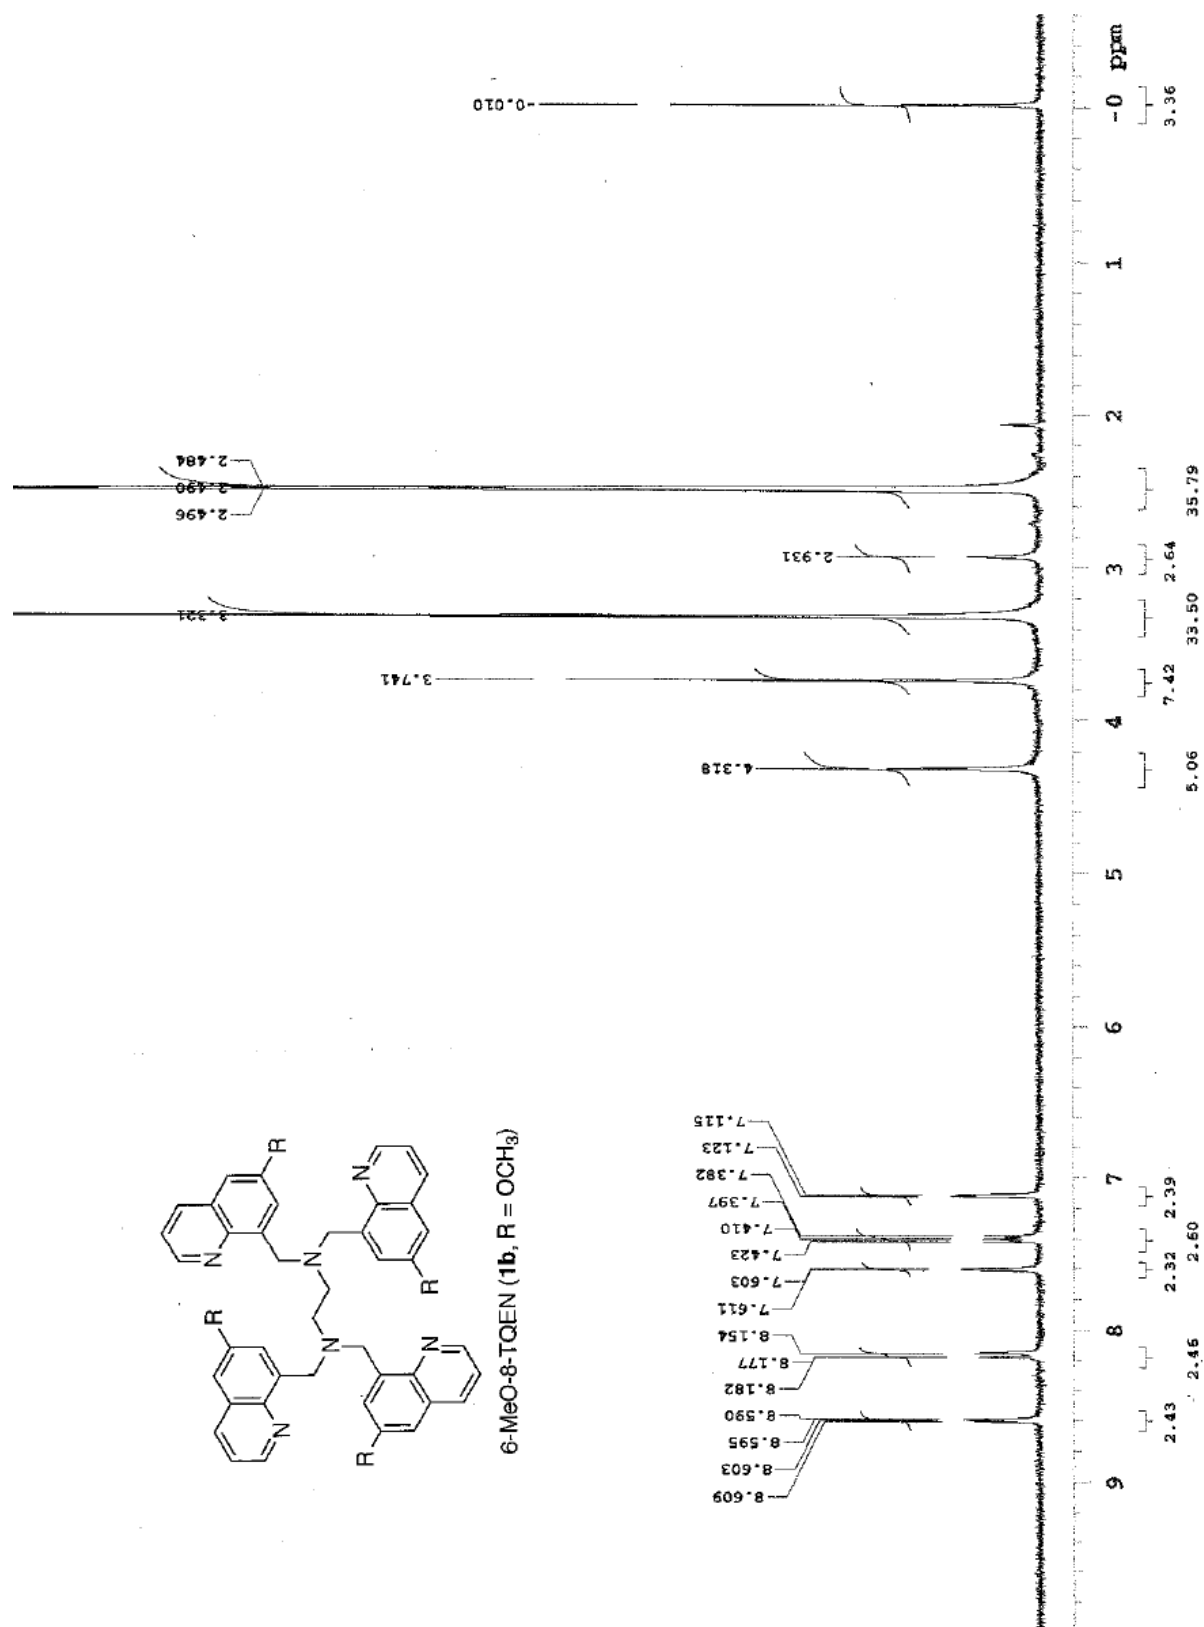

Figure S13. <sup>1</sup>H NMR spectrum of **1b** in DMSO-d<sub>6</sub>.

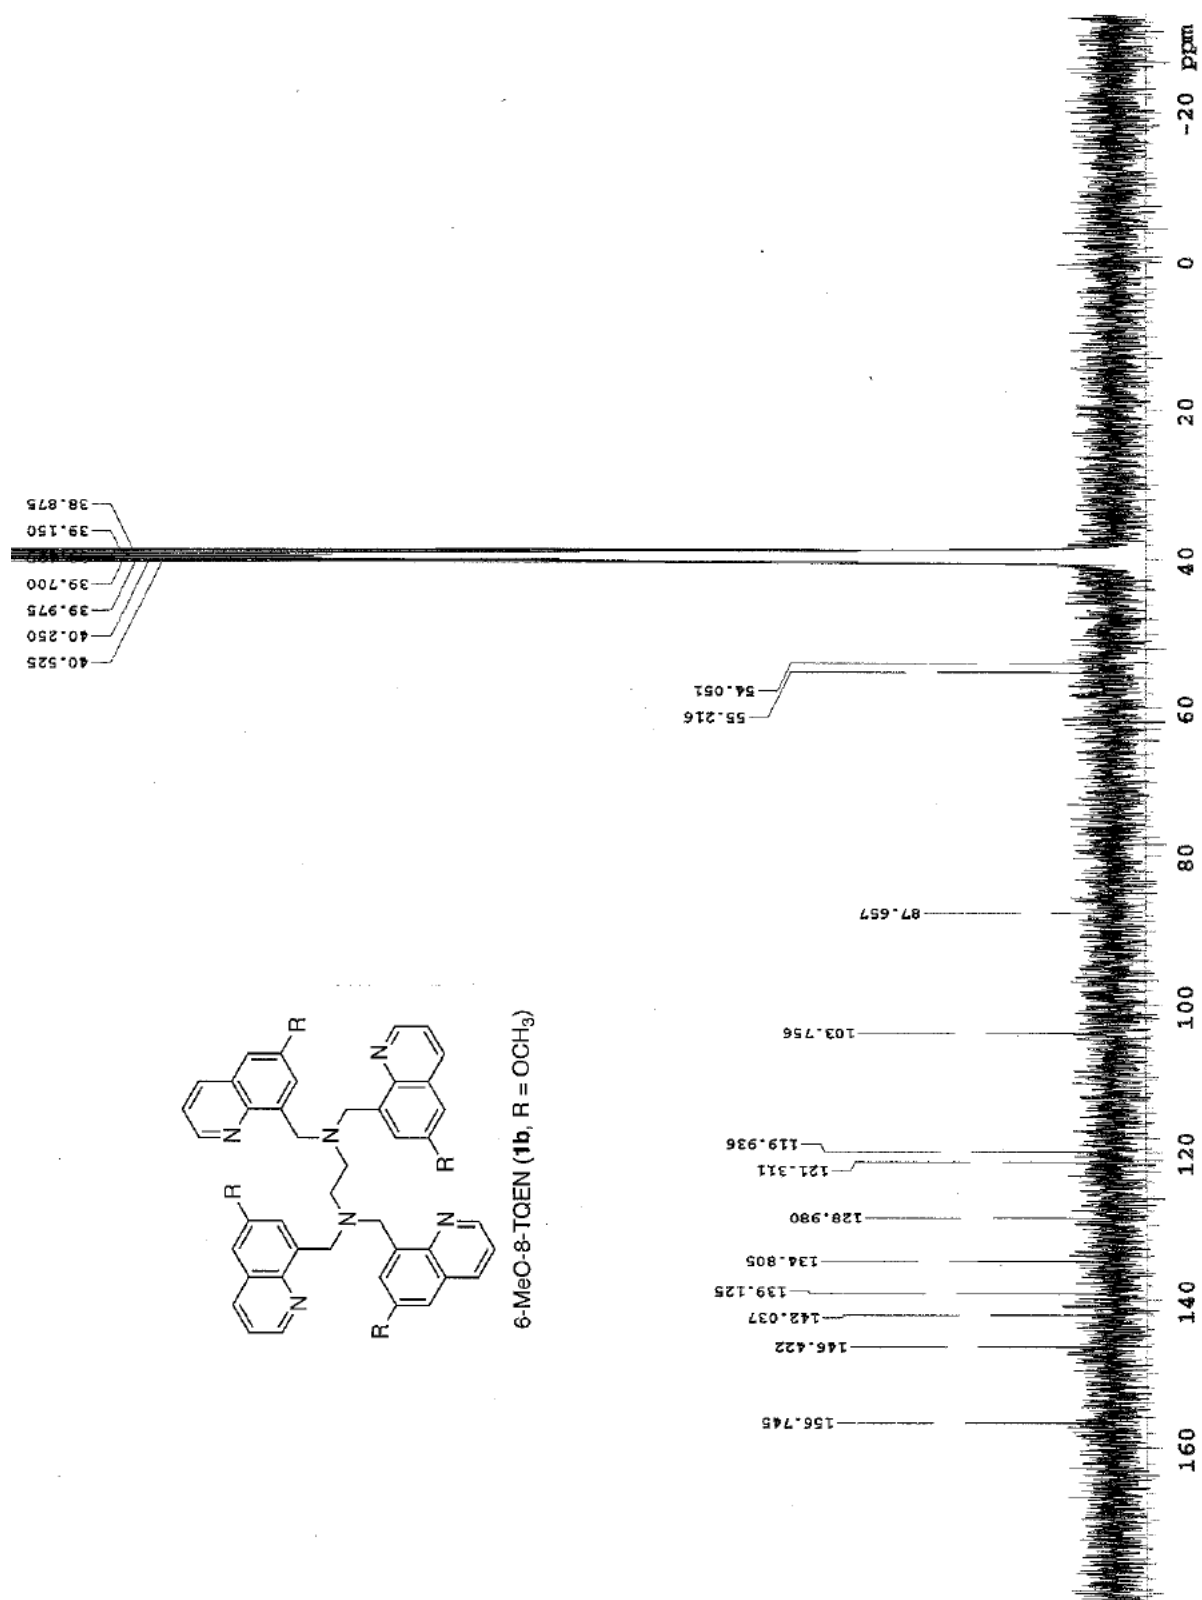

Figure S14. <sup>13</sup>C NMR spectrum of **1b** in DMSO-*d*<sub>6</sub>.

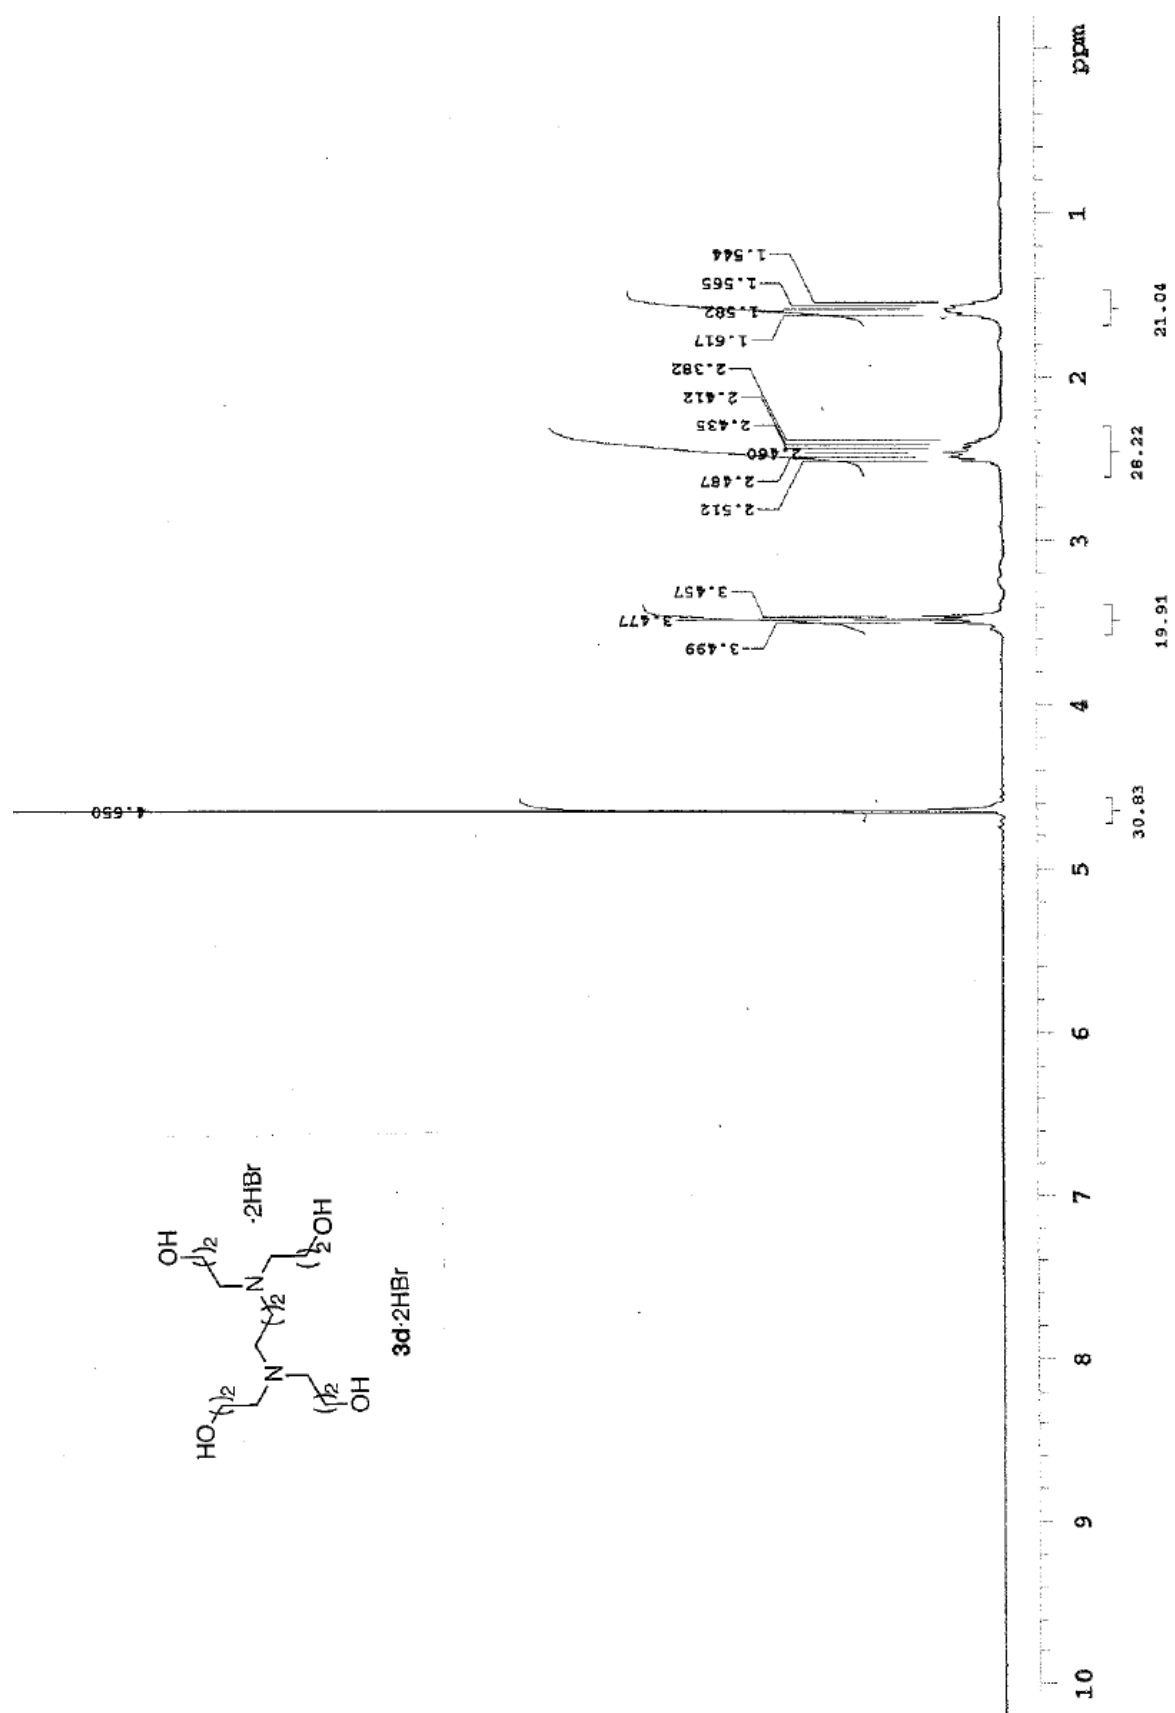

**Figure S15.**  $^1\text{H}$  NMR spectrum of **3d·2HBr** in  $\text{D}_2\text{O}$ .



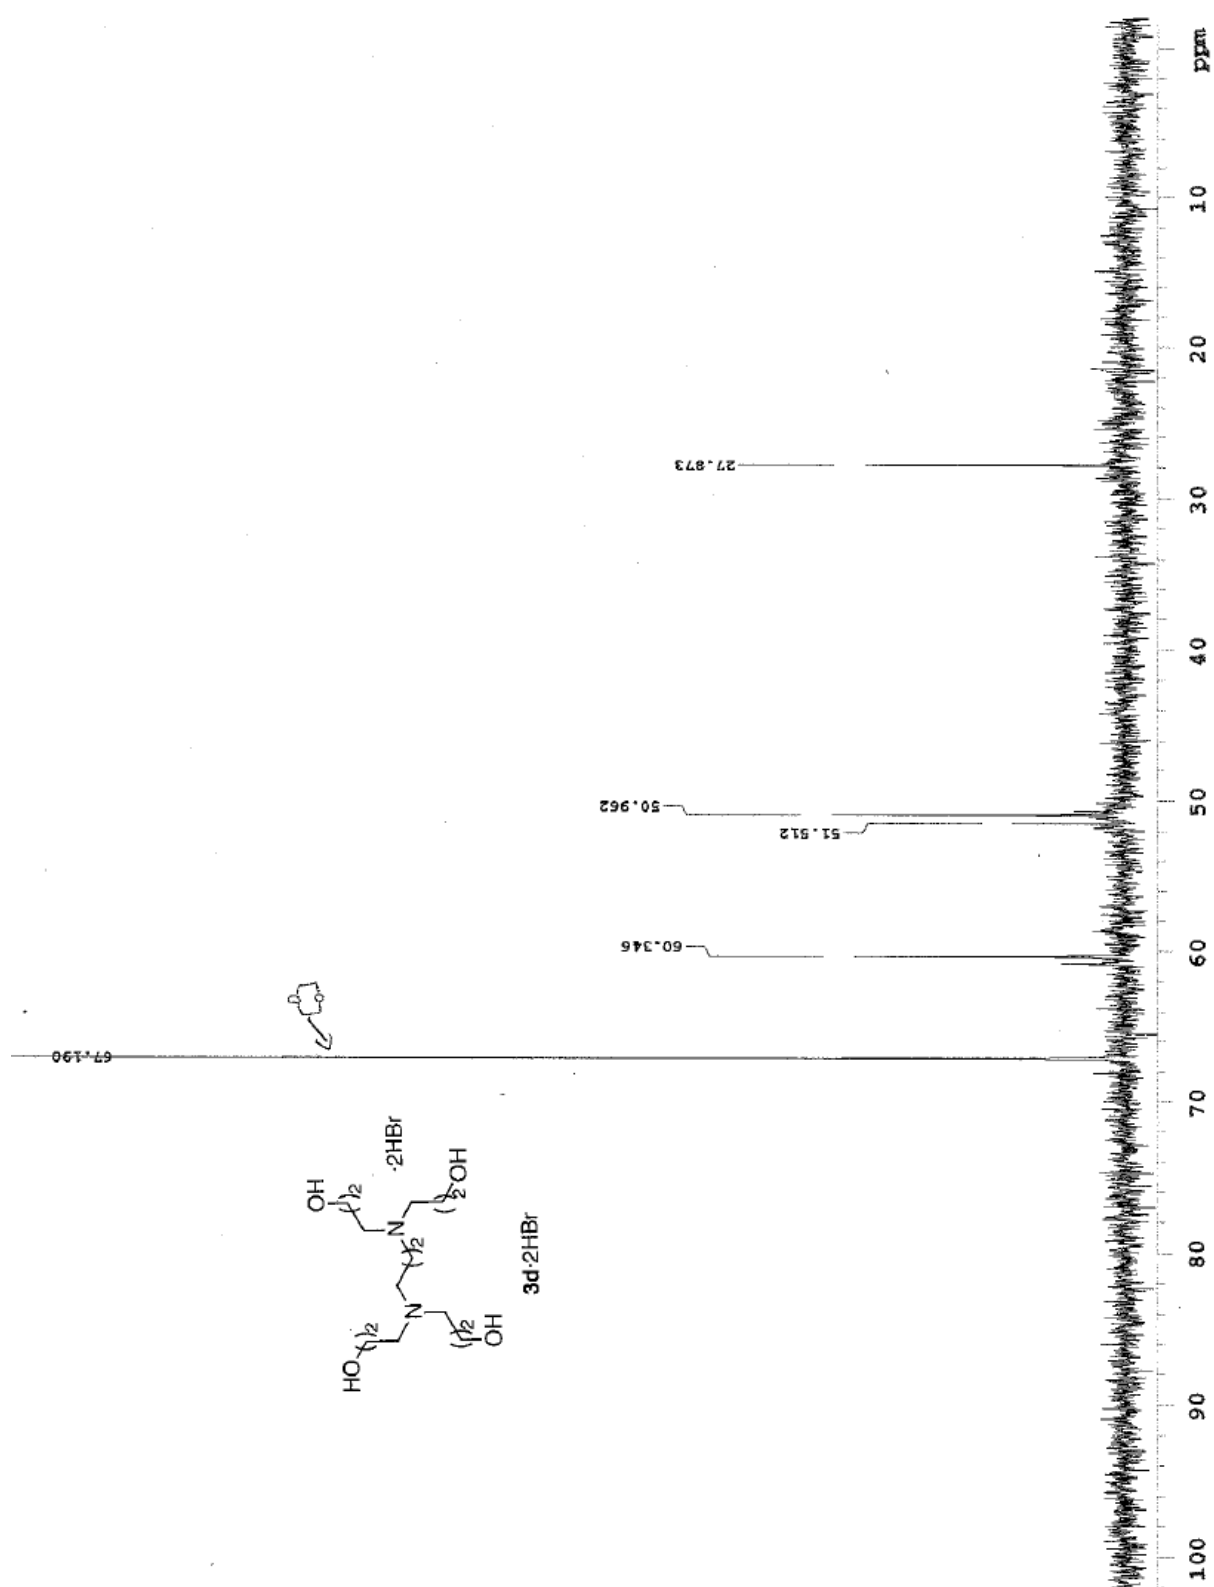

**Figure S16.**  $^{13}\text{C}$  NMR spectrum of **3d**·2HBr in  $\text{D}_2\text{O}$ .

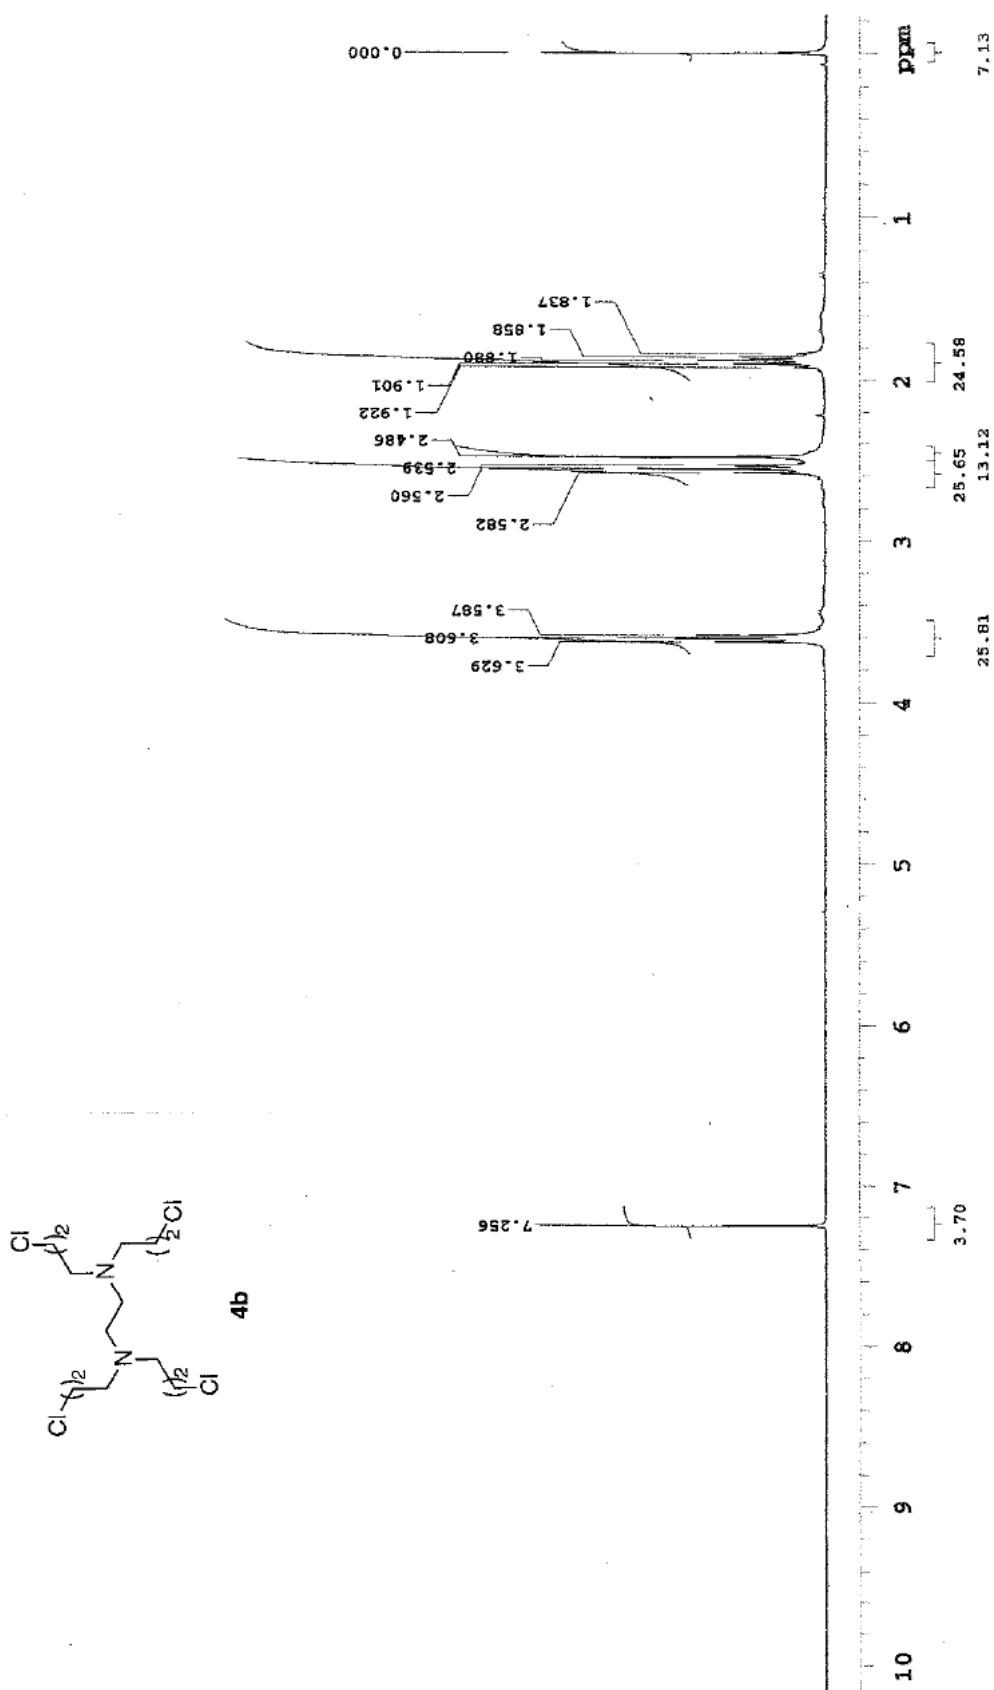

Figure S17.  $^1\text{H}$  NMR spectrum of **4b** in  $\text{CDCl}_3$ .

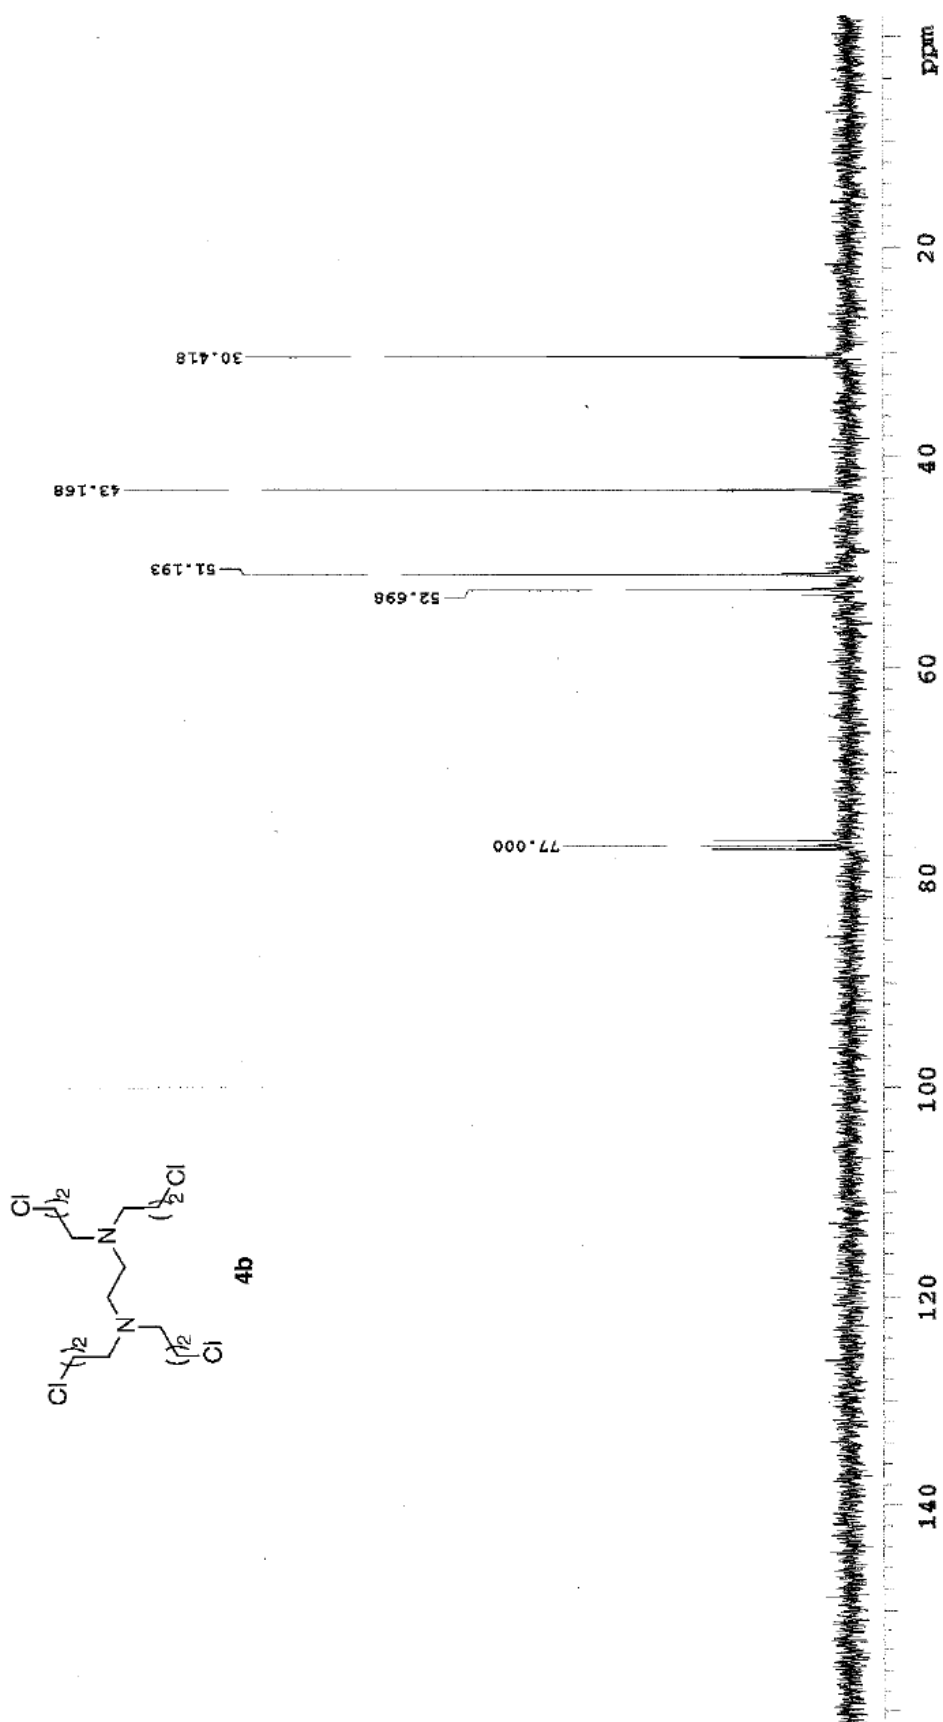

**Figure S18.**  $^{13}\text{C}$  NMR spectrum of **4b** in  $\text{CDCl}_3$ .

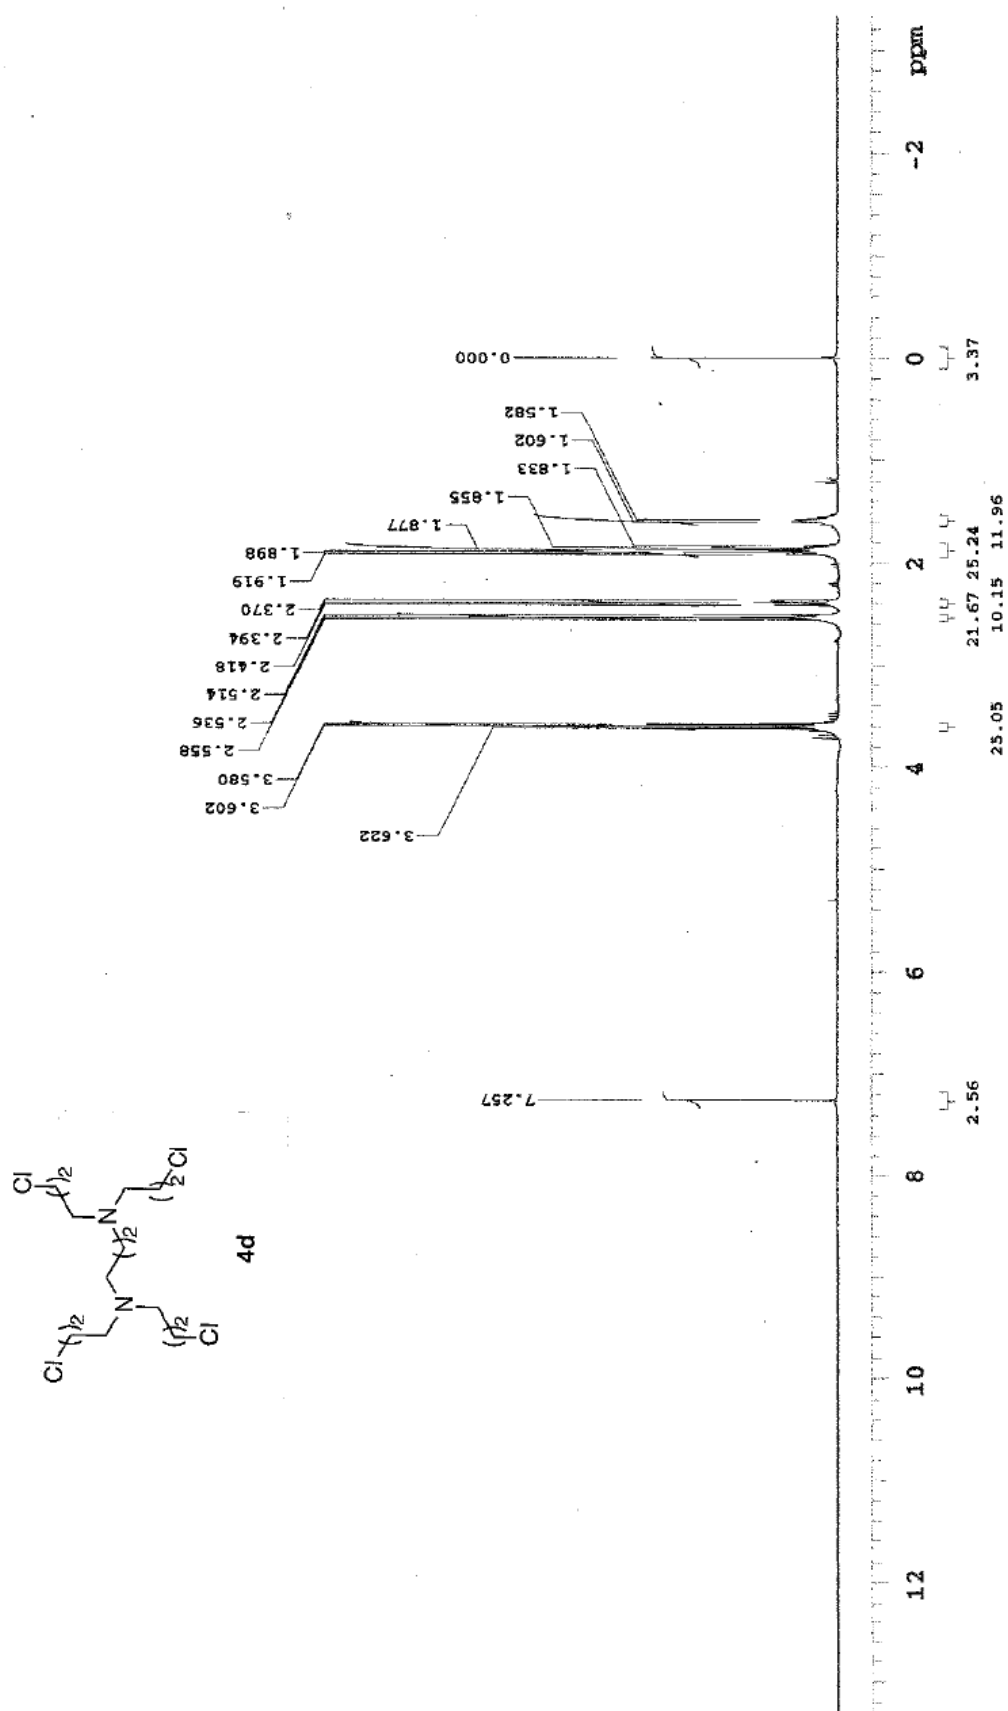

Figure S19.  $^1\text{H}$  NMR spectrum of **4d** in CDCl<sub>3</sub>.

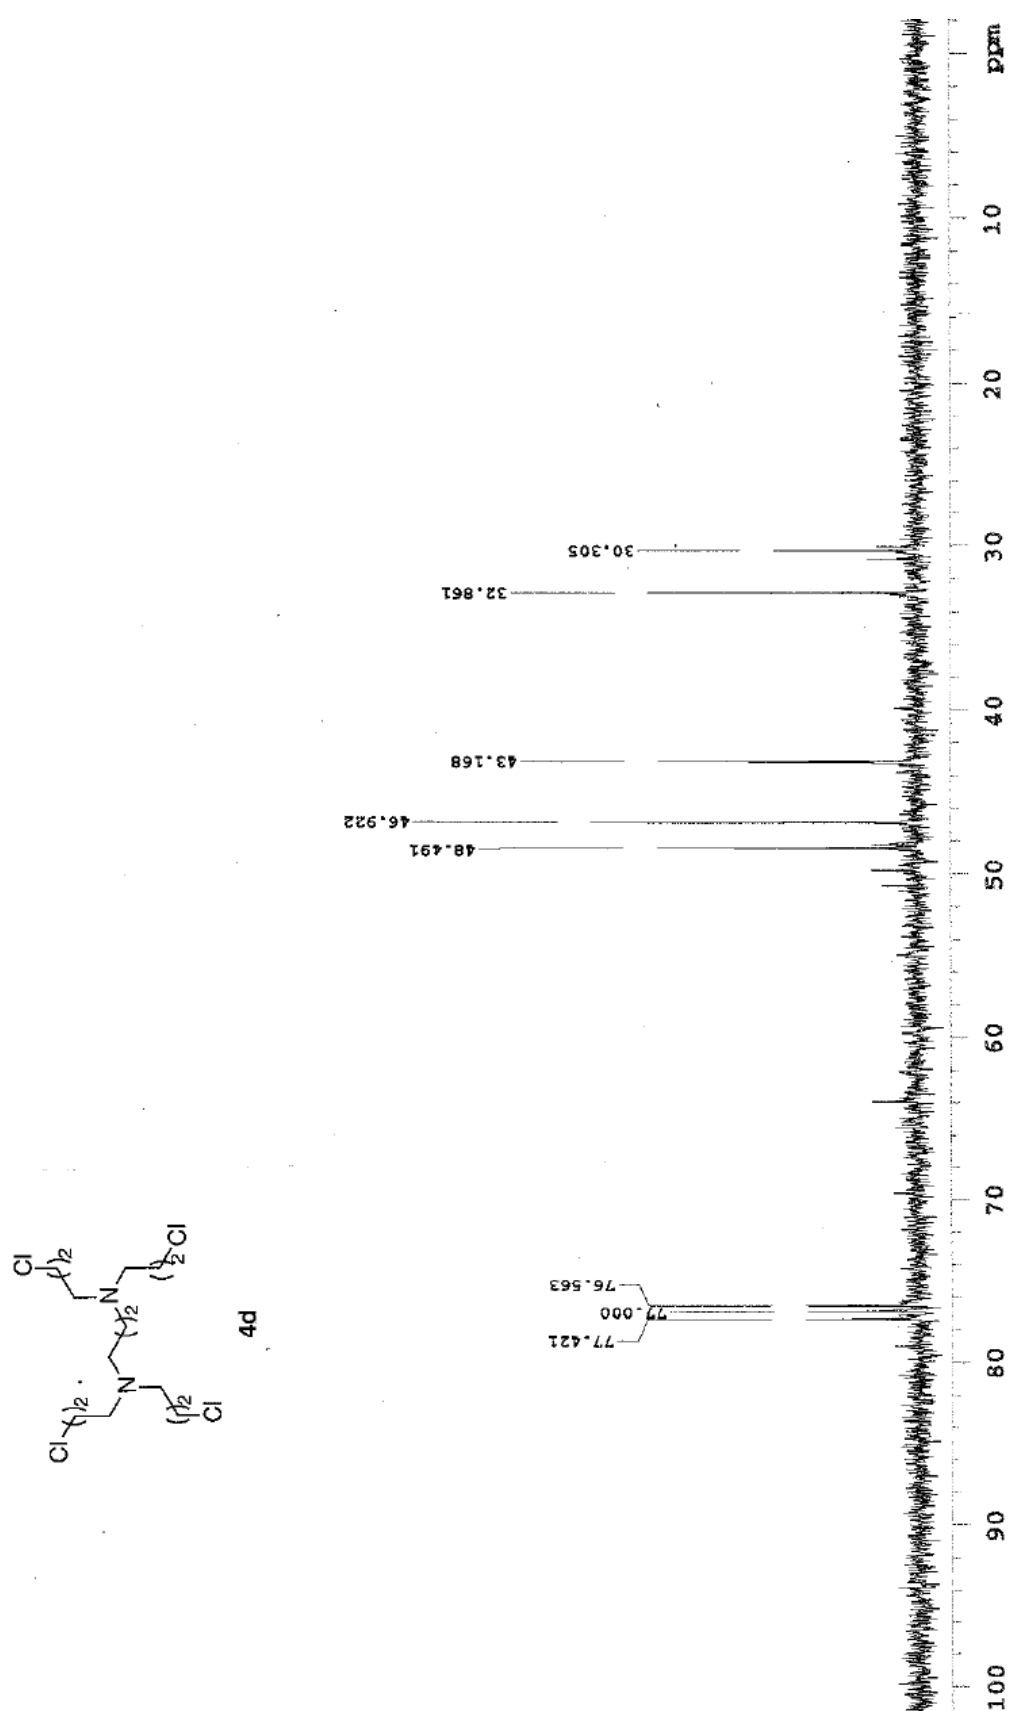

**Figure S20.**  $^{13}\text{C}$  NMR spectrum of **4d** in  $\text{CDCl}_3$ .

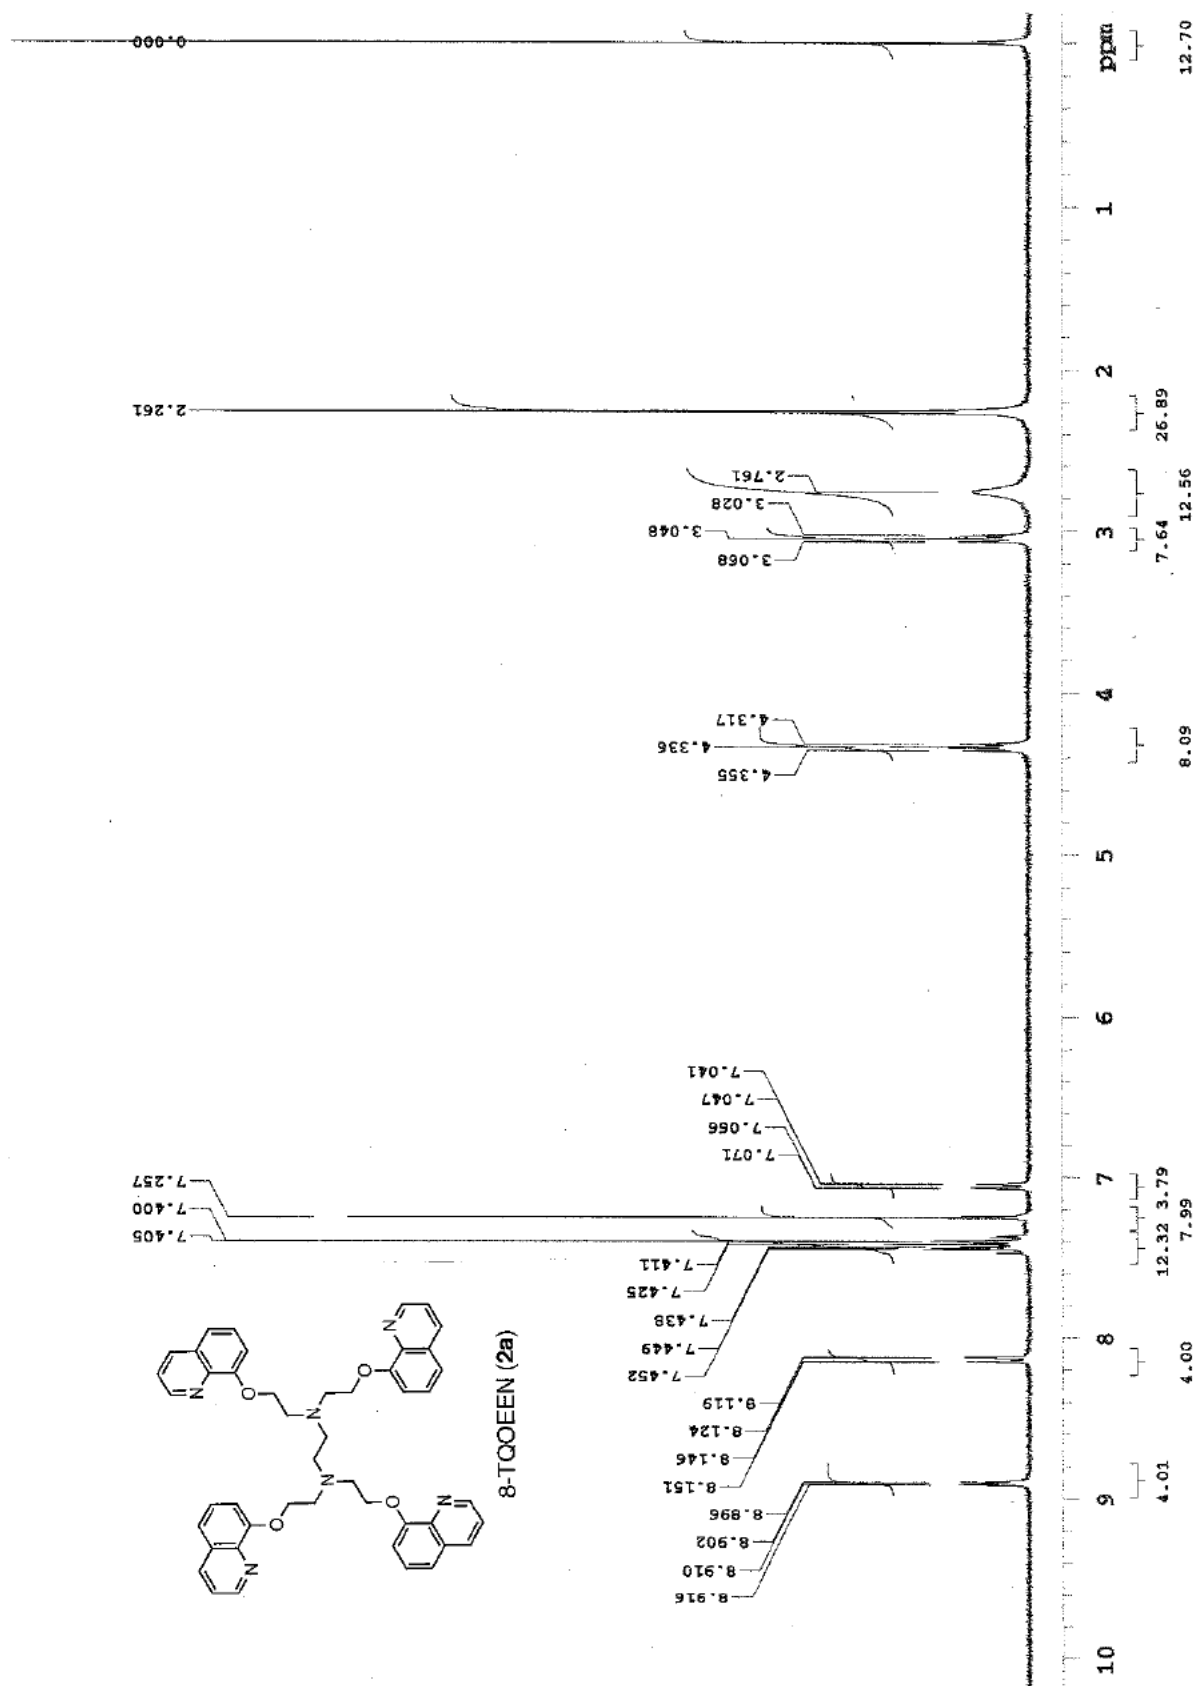

Figure S21.  $^1\text{H}$  NMR spectrum of 8-TQOEEN (2a) in CDCl<sub>3</sub>.

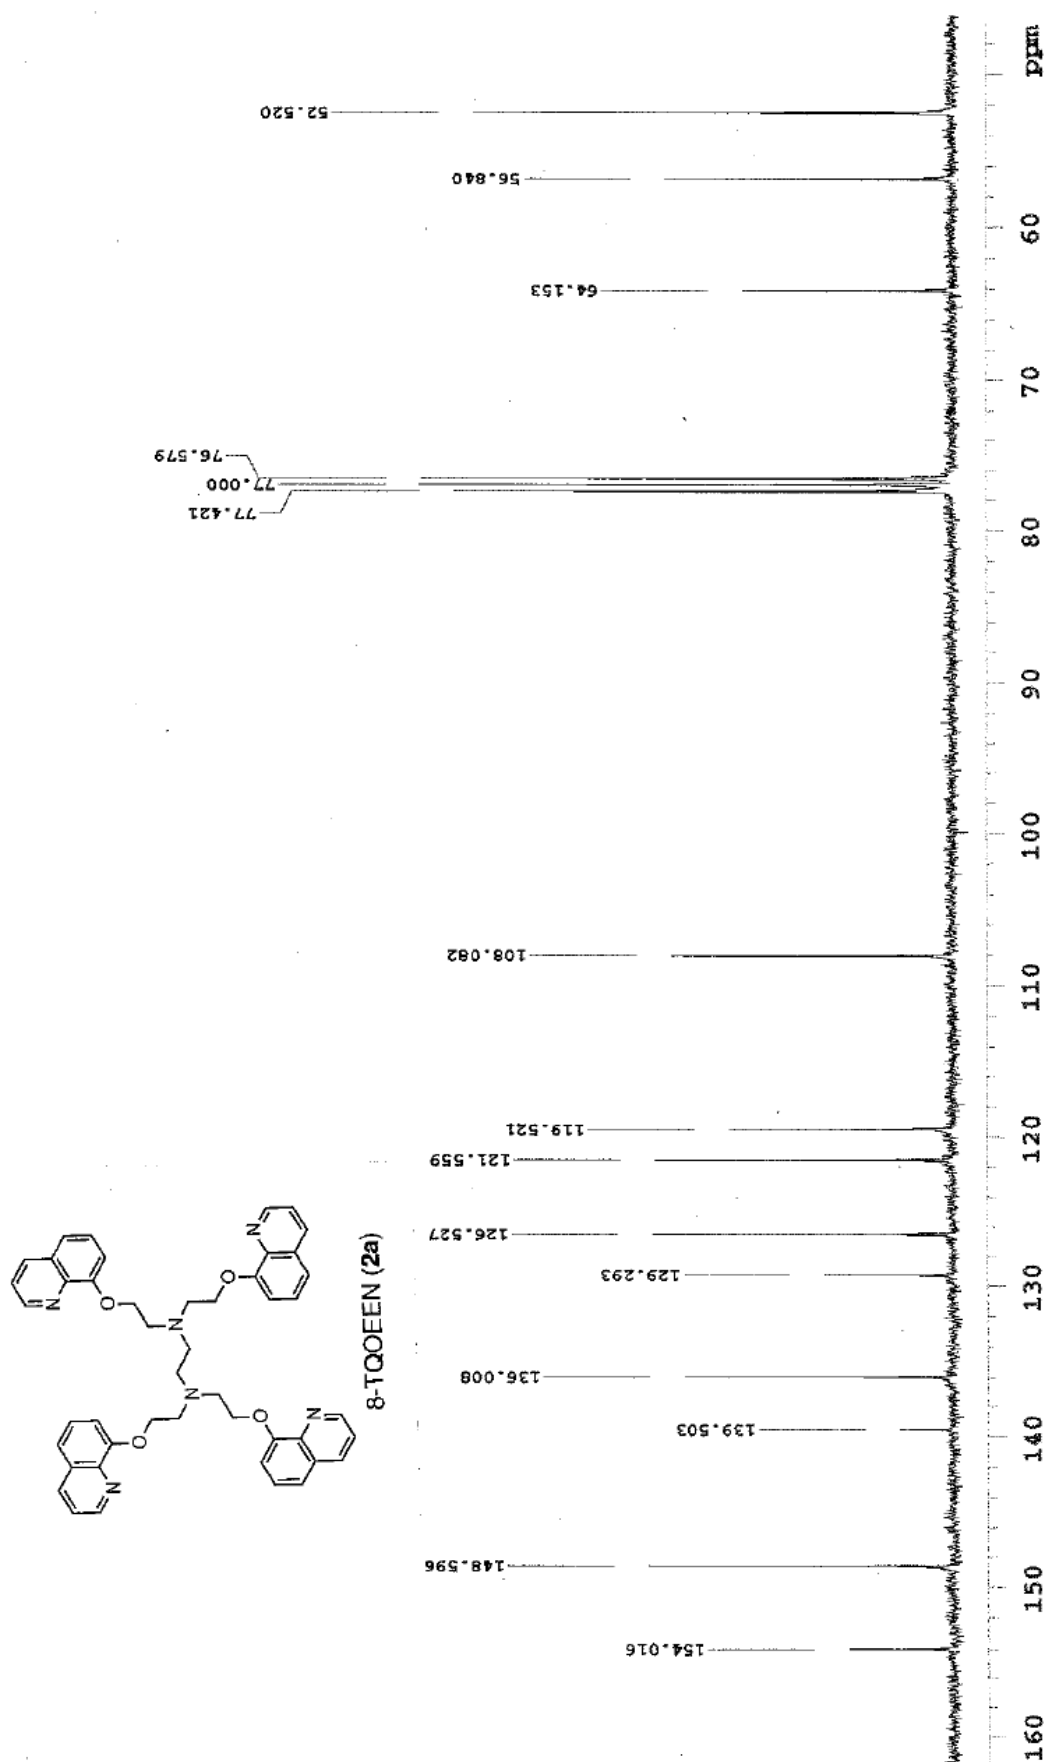

**Figure S22.**  $^{13}\text{C}$  NMR spectrum of 8-TQOEEN (2a) in  $\text{CDCl}_3$ .

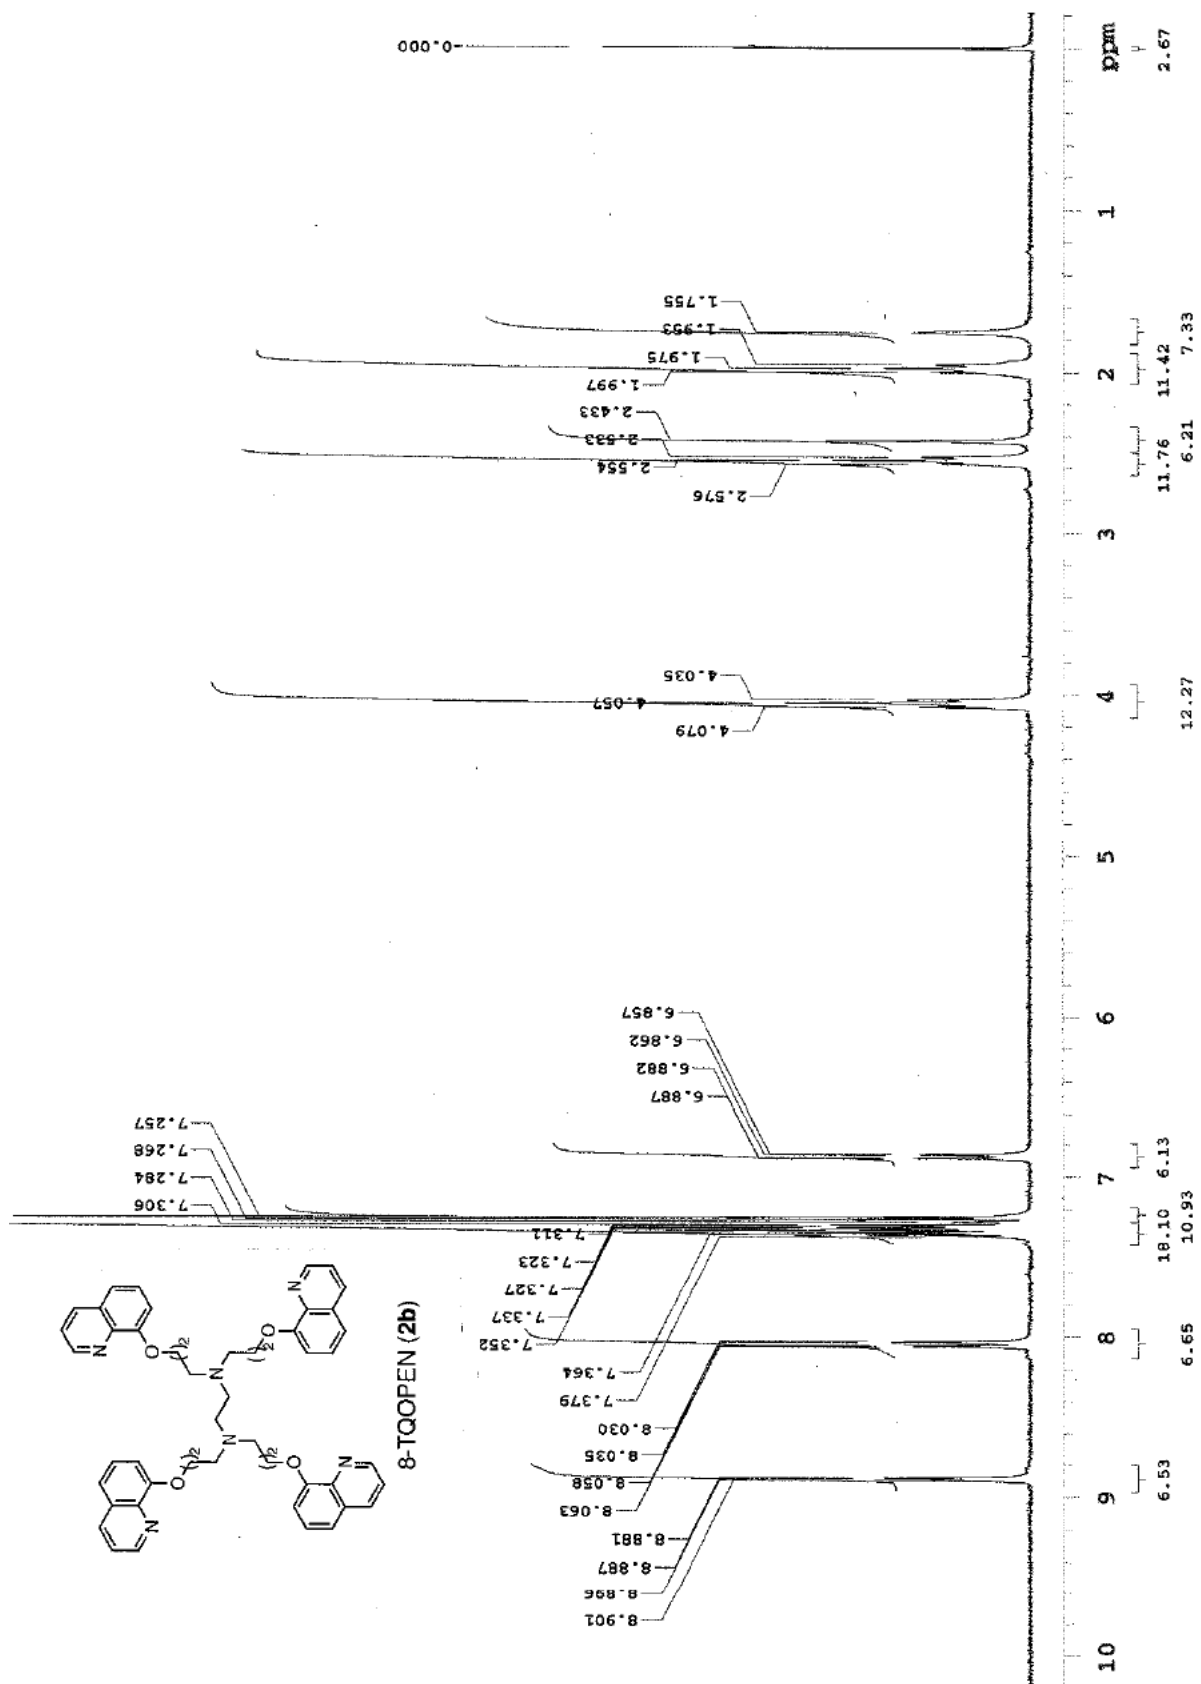

**Figure S23.**  $^1\text{H}$  NMR spectrum of 8-TQOPEN (**2b**) in  $\text{CDCl}_3$ .



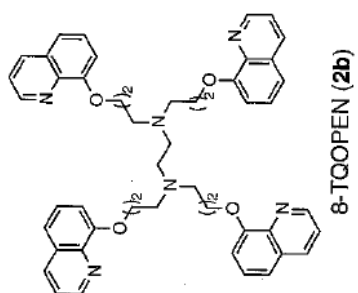

**Figure S24.**  $^{13}\text{C}$  NMR spectrum of 8-TQOPEN (**2b**) in  $\text{CDCl}_3$ .

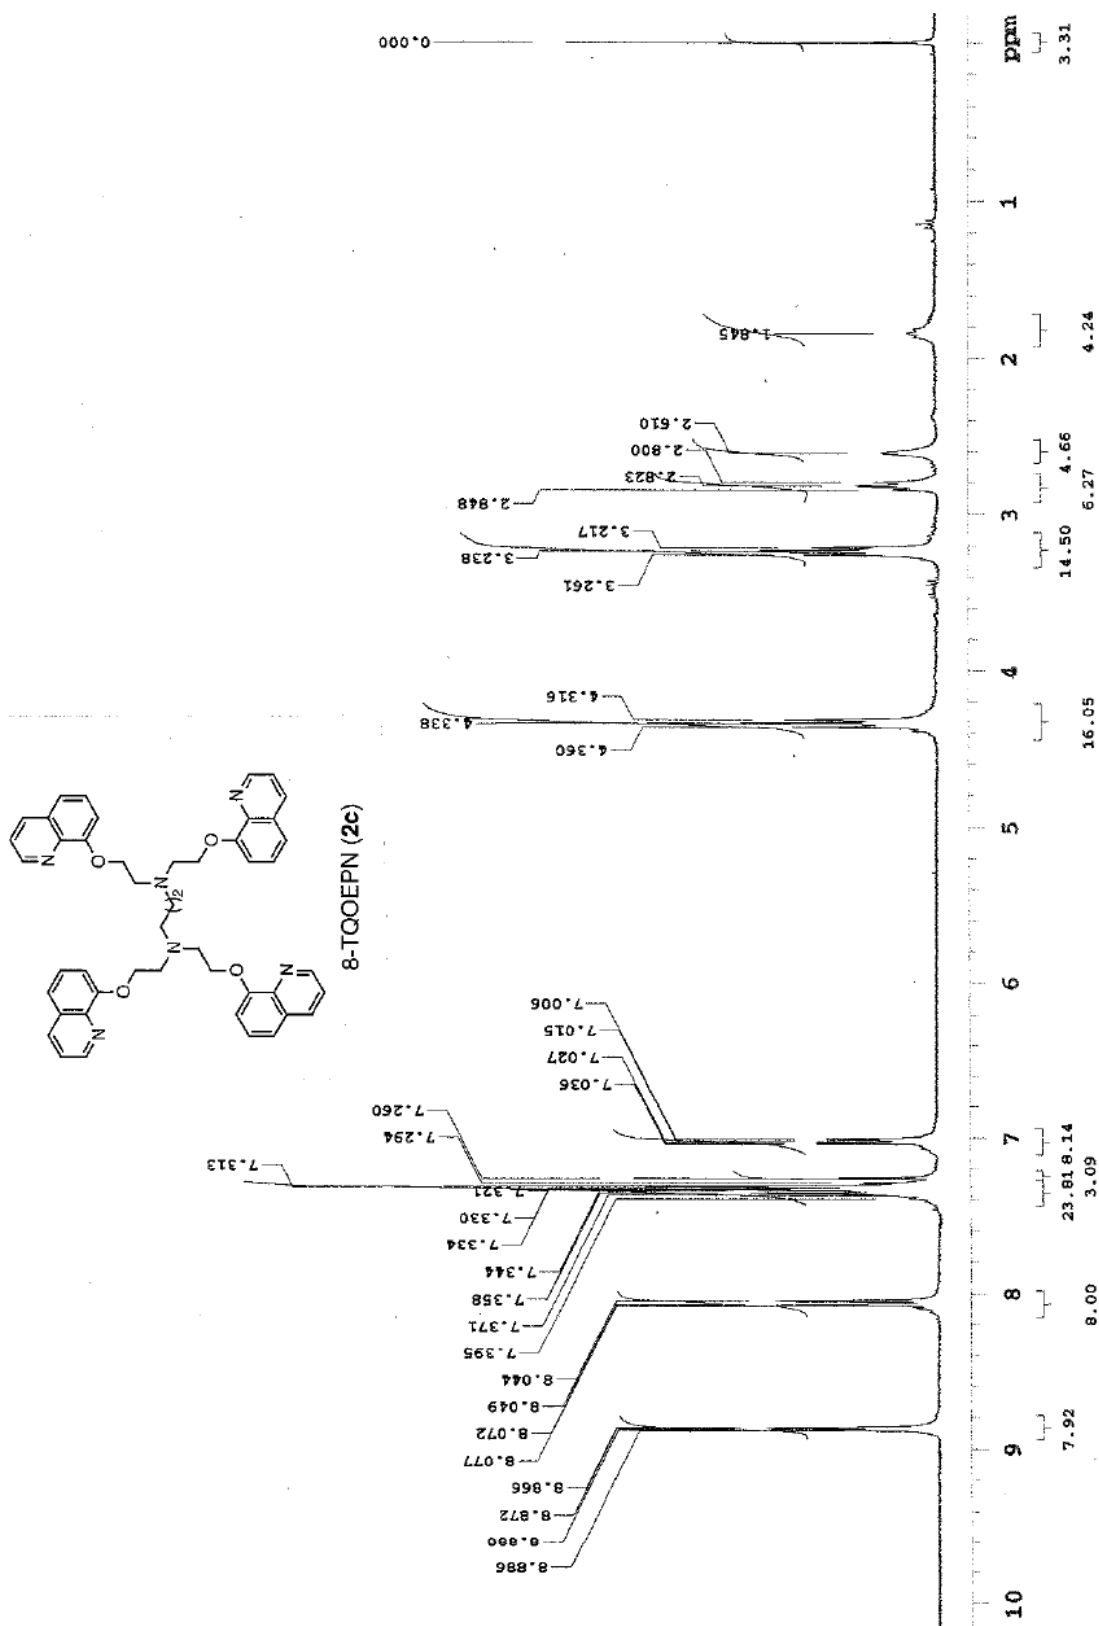

**Figure S25.** <sup>1</sup>H NMR spectrum of 8-TQOEPN (2c) in CDCl<sub>3</sub>.

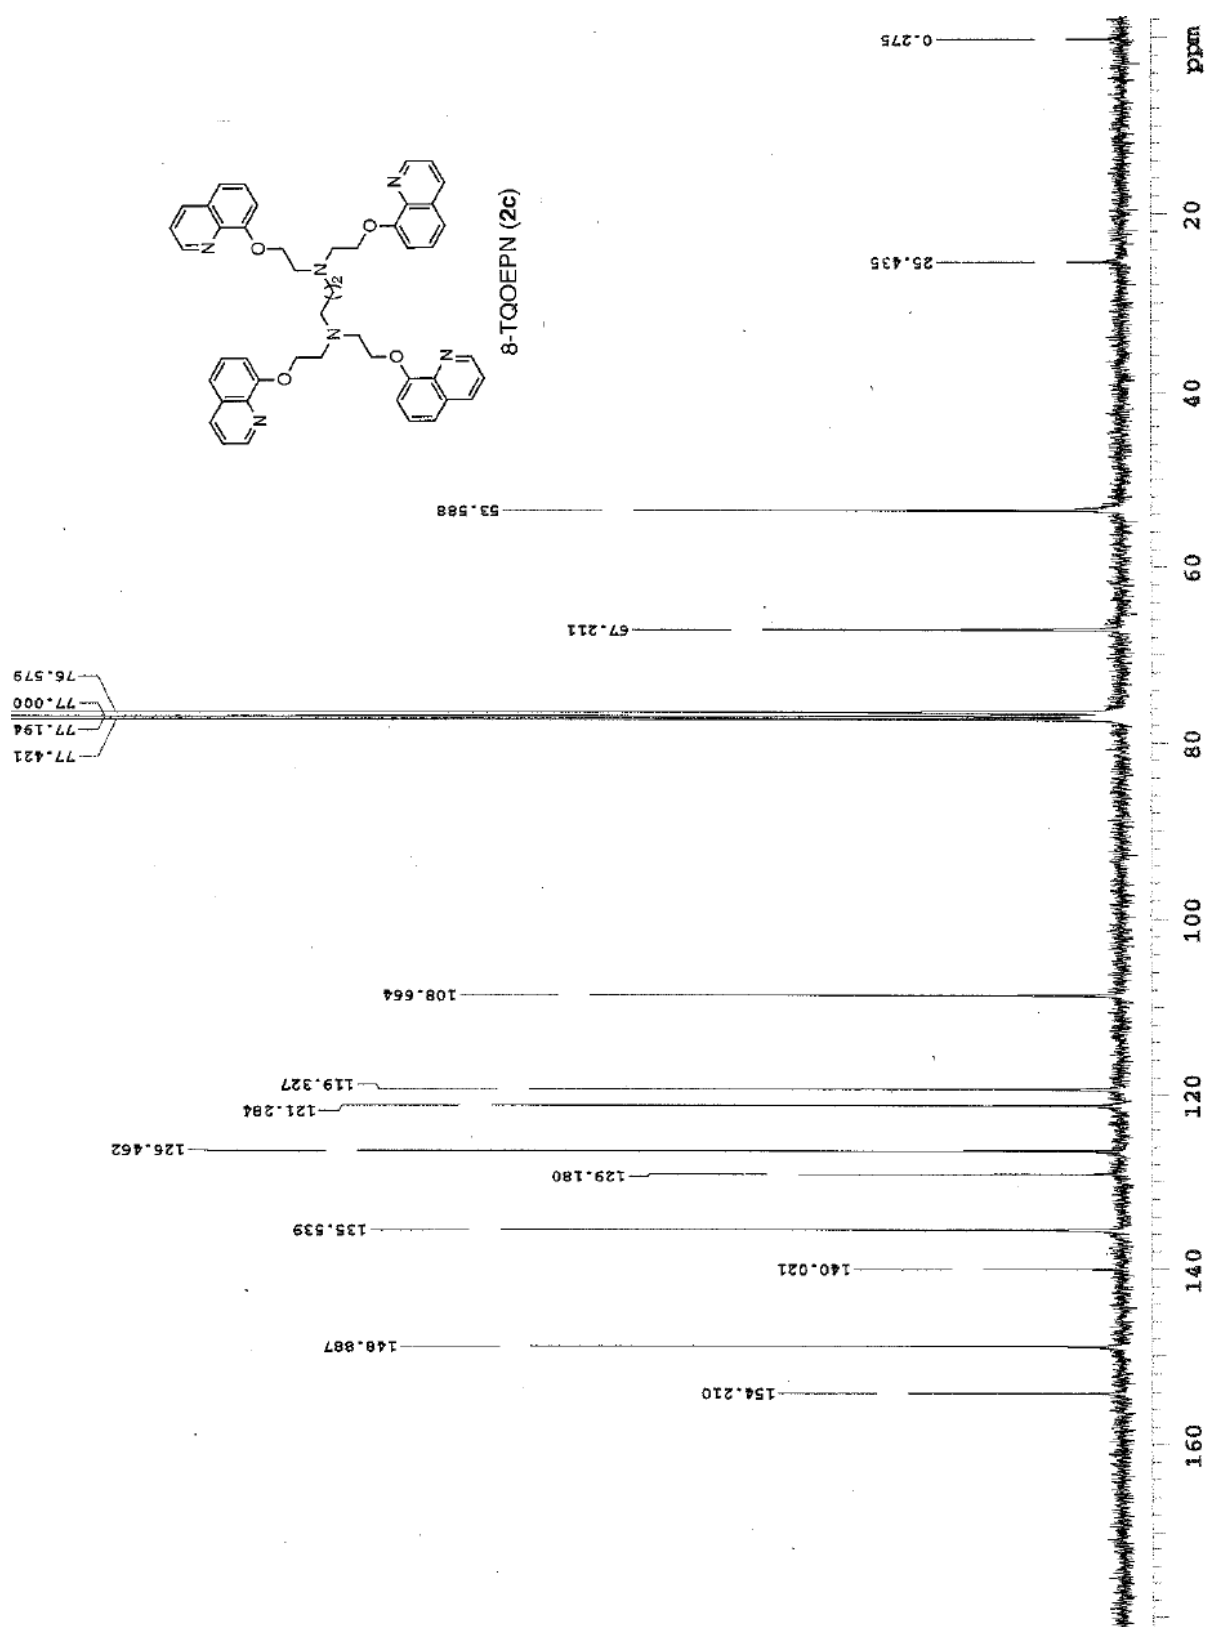

**Figure S26.**  $^{13}\text{C}$  NMR spectrum of 8-TQOEPN (2c) in  $\text{CDCl}_3$ .

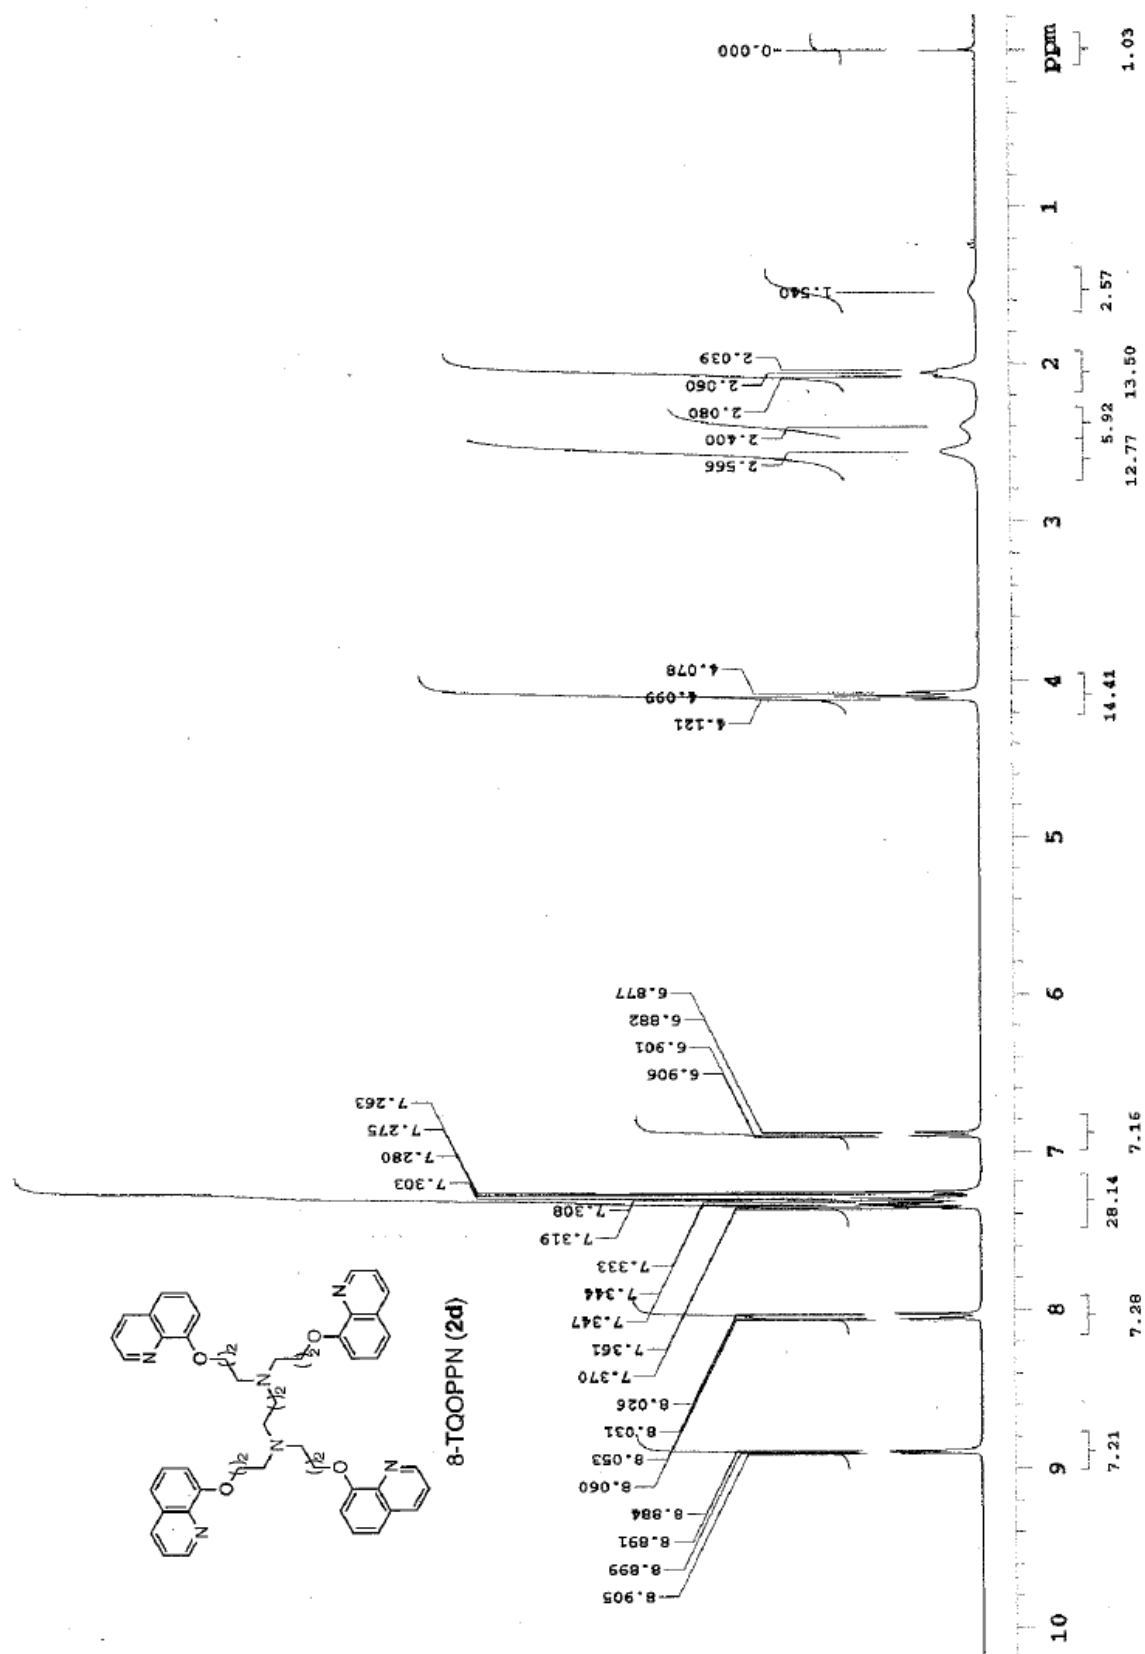

**Figure S27.** <sup>1</sup>H NMR spectrum of 8-TQOPPN (2d) in CDCl<sub>3</sub>.

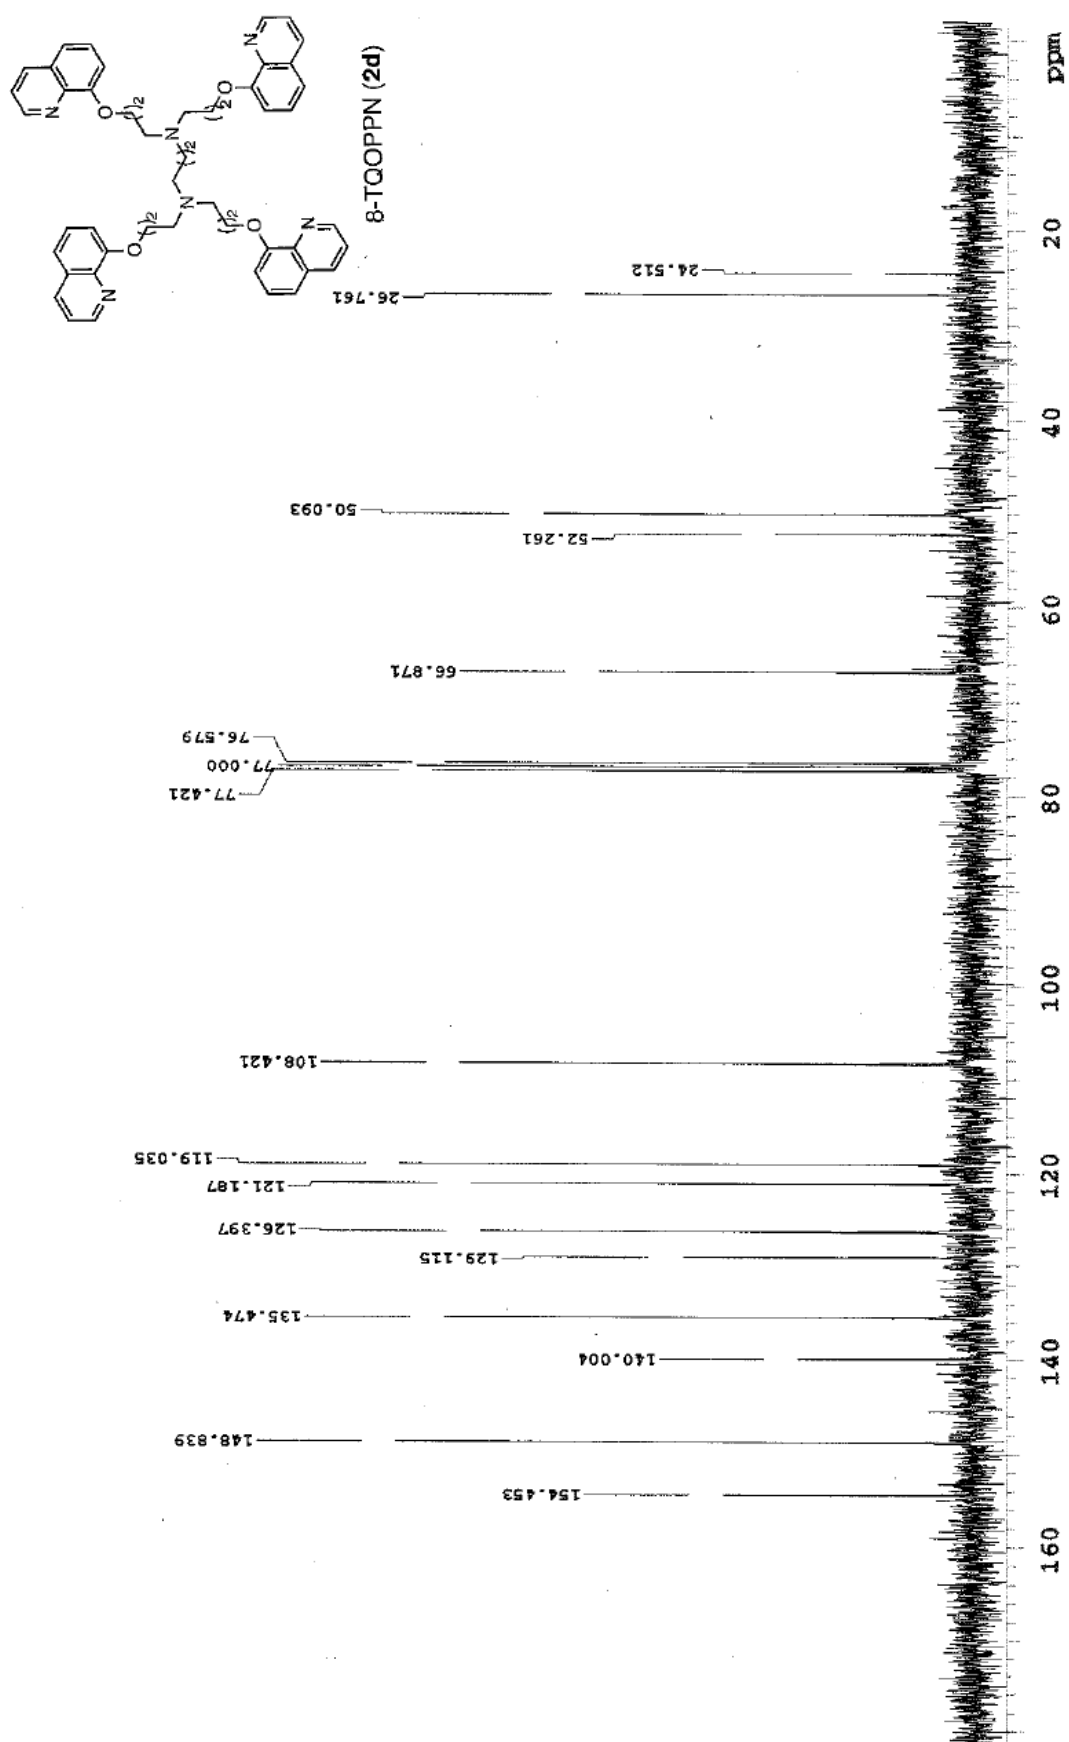

Figure S28.  $^{13}\text{C}$  NMR spectrum of 8-TQOPPN (2d) in  $\text{CDCl}_3$ .
